# 1 **GPI anchor remodeling by the plant PGAP1 ortholog HLD1 is essential for** 2 ***Papaver* self-incompatibility**

3  
4 Zongcheng Lin<sup>1,2,6,\*</sup>, Fei Xie<sup>1,2,6</sup>, Marina Triviño<sup>1,2,3,6</sup>, Tao Zhao<sup>4</sup>, Frederik Coppens<sup>1,2</sup>, Lieven  
5 Sterck<sup>1,2</sup>, Maurice Bosch<sup>3,\*</sup>, Veronica E. Franklin-Tong<sup>5,\*</sup>, and Moritz K. Nowack<sup>1,2,\*</sup>  
6  
7

8 <sup>1</sup>Department of Plant Biotechnology and Bioinformatics, Ghent University, Ghent, 9052,  
9 Belgium

10 <sup>2</sup>Center for Plant Systems Biology, VIB, Ghent, 9052, Belgium

11 <sup>3</sup>Institute of Biological, Environmental and Rural Sciences (IBERS), Aberystwyth University,  
12 Gogerddan, Aberystwyth, SY23 3EB, UK

13 <sup>4</sup>State Key Laboratory of Crop Stress Biology for Arid Areas/Shaanxi Key Laboratory of Apple,  
14 College of Horticulture, Northwest A & F University, Yangling, 712100, China

15 <sup>5</sup>School of Biosciences, University of Birmingham, Edgbaston, Birmingham, B15 2TT, U.K

16 <sup>6</sup>These authors contributed equally

17 \*Corresponding authors  
18  
19

20 \*Zongcheng Lin: [zongcheng.lin@psb.vib-ugent.be](mailto:zongcheng.lin@psb.vib-ugent.be)

21 Fei Xie: [fexie@psb.vib-ugent.be](mailto:fexie@psb.vib-ugent.be)

22 Marina Triviño: [mam124@aber.ac.uk](mailto:mam124@aber.ac.uk)

23 Tao Zhao: [tao.zhao@nwafu.edu.cn](mailto:tao.zhao@nwafu.edu.cn)

24 Frederik Coppens: [frcop@psb.vib-ugent.be](mailto:frcop@psb.vib-ugent.be)

25 Lieven Sterck: [liste@psb.vib-ugent.be](mailto:liste@psb.vib-ugent.be)

26 \*Maurice Bosch: [mub@aber.ac.uk](mailto:mub@aber.ac.uk)

27 \*Veronica E. Franklin-Tong: [v.e.franklin-tong@bham.ac.uk](mailto:v.e.franklin-tong@bham.ac.uk)

28 \*Moritz K. Nowack: [moritz.nowack@psb.vib-ugent.be](mailto:moritz.nowack@psb.vib-ugent.be)  
29  
30

31 **Short title:** A PGAP1 ortholog regulates *Papaver* SI  
32  
33

34 **One sentence summary:** The *Papaver* self-incompatibility response requires GPI-anchor  
35 modification by HLD1, an ortholog of the mammalian PGAP1.  
36  
37

38 **Key words:** GPI-inositol deacylase, *PGAP1*, GPI-AP remodeling, self-incompatibility,  
39 programmed cell death, pollen rejection, Arabidopsis  
40  
41

## 42 **Abstract**

43 In eukaryotes, glycosylphosphatidylinositol anchored proteins (GPI-APs) are tethered to the  
44 outer leaflet of the plasma membrane where they function as key regulators of a plethora of  
45 biological processes. Self-incompatibility (SI) plays a pivotal role regulating fertilization in  
46 higher plants through recognition and rejection of ‘self’ pollen. Here we used *Arabidopsis*  
47 *thaliana* lines engineered to be self-incompatible by expression of *Papaver* SI determinants for  
48 an SI suppressor screen. We identify *HLD1*, an ortholog of human GPI-inositol deacylase  
49 *PGAP1*, whose mutation completely abolishes the SI response. We show that HLD1 functions  
50 as a GPI-inositol deacylase and that this GPI-remodeling activity is essential for SI. Using GFP-  
51 SKU5 as a representative GPI-AP, we show that *HLD1* mutation does not affect GPI-AP  
52 production and targeting, but alters the configuration of mature GPI-APs. This prevents GPI-  
53 AP release from the plasma membrane, suggesting that this process plays a critical role in the  
54 regulation of SI. Our data not only identify GPI anchoring as a new pathway of SI providing  
55 new directions to investigate SI mechanisms, but identifies for the first time a function for GPI-  
56 AP remodeling by inositol deacylation in plants.

57

## 58 **Introduction**

59 Glycosylphosphatidylinositol (GPI) anchoring is a highly conserved post-translational  
60 modification in eukaryotes and plays crucial roles in the targeting and tethering of GPI-  
61 anchored proteins (GPI-APs) to the outer leaflet plasma membrane<sup>1,2</sup>. Over 150 GPI-APs are  
62 predicted in humans and more than 250 in *Arabidopsis* (*Arabidopsis thaliana*)<sup>3,4</sup>. GPI-APs are  
63 functionally diverse; they are key regulators of cell signaling, growth, morphogenesis,  
64 reproduction and pathogenesis in yeast, mammals, and plants<sup>5-7</sup>. GPI-AP biosynthesis,  
65 remodeling, and export are well-characterized in yeast and animal cells<sup>8,9</sup>. The GPI anchor is  
66 synthesized and transferred to target proteins in the endoplasmic reticulum (ER)<sup>1</sup>. Knockouts  
67 of *Phosphatidylinositol glycan anchor biosynthesis* (*PIG*) genes in mouse and *Arabidopsis*  
68 show that GPI-anchor synthesis is essential for early embryo and tissue development<sup>6,10,11</sup>.  
69 Although comparatively little is known about this process in plants, studies have shown that  
70 several proteins involved in GPI anchor biosynthesis are required for plant viability and male  
71 fertility<sup>6</sup>. Once the GPI anchor is attached to a target protein, several remodeling steps take  
72 place. In animals, the first step involves the removal of an acyl chain on the GPI inositol, by  
73 post-GPI attachment to proteins 1 (PGAP1), a GPI-inositol deacylase<sup>12</sup>. This step is important  
74 for the efficient transport of GPI-APs to the outer leaflet of the plasma membrane<sup>5,8</sup>, where  
75 they are either retained or released by cleavage<sup>13</sup>. However, although putative homologs of

76 *PGAPI* have been identified in plant genomes<sup>6,14</sup>, there are no functional data about this GPI  
77 remodeling and maturation step in plants.

78  
79 Self-incompatibility (SI) regulates the rejection of ‘self’ pollen that is deposited on the stigma  
80 of the same species, preventing inbreeding and promoting genetic diversity. Generally, SI is  
81 genetically controlled by a polymorphic multi-allelic *S*-locus, with each *S*-haplotype encoding  
82 a pair of *S*-determinants<sup>15</sup>. Stigmas discriminate between “self” and “non-self” pollen using  
83 allele-specific interactions between these two *S*-determinants. In field poppy (*Papaver rhoeas*),  
84 the female *S*-determinant *PrsS* is specifically expressed in the stigma<sup>16</sup>, whereas the male *S*-  
85 determinant *PrpS* is specifically expressed in pollen<sup>17</sup>. Cognate *PrpS*-*PrsS* interaction triggers  
86 a well characterized signaling network resulting in pollen tube growth arrest and programmed  
87 cell death (PCD) in ‘self’-pollen<sup>18</sup>. Recently, we showed that Arabidopsis cells (both vegetative  
88 and reproductive cells) expressing *PrpS* undergo an SI-PCD response comparable to *Papaver*  
89 pollen when treated with cognate recombinant *PrsS* protein *in vitro*<sup>19,20</sup>. Furthermore, cognate  
90 *PrpS* and *PrsS* co-expressed in the self-compatible model plant Arabidopsis trigger a robust  
91 *Papaver*-like SI response. This SI process rendered Arabidopsis lines effectively self-  
92 incompatible demonstrating that *Papaver* *S*-determinants are sufficient to confer functional SI  
93 in Arabidopsis<sup>19,20</sup>. These self-incompatible Arabidopsis lines (named *At*-SI hereafter) provide  
94 a facile macroscopic readout of SI-PCD, as self-pollinated *At*-SI lines do not set seed and silique  
95 development does not occur.

96  
97 Here we used the *At*-SI lines as the basis for a forward genetic mutant screen to identify new  
98 genes involved in controlling *Papaver* SI. We identified 12 mutant alleles of *highlander1* (*hld1*)  
99 with suppressed SI resulting in restoration of self-compatibility. We demonstrated that *HLD1*  
100 is a functional ortholog of the mammalian *PGAPI* gene involved in the deacylation of GPI-  
101 APs. The *HLD1* mutation results in “three-footed” GPI-APs but does not affect the expression  
102 of GPI-APs at the plasma membrane. This study reveals a crucial role of GPI-APs and GPI-  
103 remodeling of GPI-APs in the *Papaver* SI response and provides the first functional analysis of  
104 a GPI-remodeling protein in plants.

105

## 106 **Results**

### 107 **Identification of SI-defective *highlander* mutants**

108 To discover novel players of the *Papaver* SI process, we performed an ethyl methanesulfonate-  
109 (EMS-) based forward genetic screen on roughly 50,000 mutated *At*-SI M1 individuals for

110 suppressors of SI (**Fig S1, Materials & Methods**). We identified twelve independent self-  
111 compatible SI-repressor mutants with high levels of self-seed set and silique development after  
112 excluding those mutants with mutations in the transgene or changes in the PrpS<sub>1</sub>-GFP  
113 expression (**Fig 1A; Fig S2**). We named these mutants *highlander* (*hld*), after the immortal  
114 warriors in the 1980s cult film. To establish whether *hld* mutants disrupted SI signaling on the  
115 male (pollen) or female (stigma) side, we performed reciprocal crosses. Pollinating *hld* pollen  
116 onto *At*-SI stigmas resulted in significantly longer siliques (**Fig 1B**,  $p < 0.0001$ ) and higher seed  
117 set (**Fig S2C**,  $p < 0.0001$ ) than in the *At*-SI parent line, whereas the reciprocal cross did not (**Fig**  
118 **1B**,  $p = 0.1458$ , N.S.; **Fig S2C**,  $p = 0.0909$ , N.S.). Thus, the *hld* mutations affect SI in the pollen  
119 but not in the stigma. The identification of *hld* mutants from the M1 generation after  
120 mutagenesis suggested the gametophytic nature of the *hld* mutations. This was further  
121 confirmed by the observation that after the first backcross (BC) to the *At*-SI parent line, all the  
122 heterozygous *hld* BC1 generation plants were self-compatible (**Table S1**,  $n = 167$ ),  
123 demonstrating that the 50% mutant pollen grains produced by heterozygous plants is sufficient  
124 to restore seed set, showing that the *hlds* are gametophytic (pollen) mutants.

125

#### 126 **WGS identified *At3g27325* as the causal gene for all the *hld* mutants**

127 To reveal the molecular identity of the *hld* mutants, we used whole genome sequencing (WGS)  
128 followed by SNP analysis to map the causal gene of these *hld* mutants. We sequenced the  
129 genome of a self-compatible population of six independent mutants after two backcrosses.  
130 SHOREmap analysis<sup>21</sup> revealed six different nonsynonymous mutations in a single gene,  
131 *At3g27325* (**Fig 1C, Fig S3**). Analysis of the segregating populations revealed 100% linkage  
132 between the *At3g27325* mutation and suppression of SI (**Table S2**,  $n = 298$ ). Targeted  
133 genotyping of the remaining *hld* mutants identified six additional independent mutant alleles of  
134 the same gene (**Table S3**). These results indicate that our screen reached a high level of  
135 saturation and suggest that *At3g27325* (designated as *HLD1* hereafter), is the single causal locus  
136 for SI suppression in all the mutants identified here.

137

#### 138 **CRISPR/Cas9 confirms that *At3g27325* is the causal gene of *hld1* mutant phenotype**

139 To confirm *At3g27325* as the causal gene for SI suppression, we generated two independent  
140 CRISPR knockout mutants (*hld1-c1* and *hld1-c2*) with Arabidopsis transgenic line  
141 *pNTP303::PrpS<sub>1</sub>-GFP* (*At-PrpS<sub>1</sub>*) as the background (**Fig S4**), as the non-mutagenized parent  
142 line *At*-SI is self-incompatible and unfeasible to use. Pollinating *At*-SI stigmas expressing *PrpS<sub>1</sub>*  
143 with *At-PrpS<sub>1</sub>* pollen resulted in a SI phenotype with short siliques and no seed set. However,

144 *At*-SI stigmas pollinated with *At-PrpS<sub>1</sub>/hld1-c1* or *At-PrpS<sub>1</sub>/hld1-c2* pollen displayed normal  
145 siliques and seed set (**Fig 1D, Fig S5A**). This demonstrates that targeted knockout mutation of  
146 *At3g27325* is sufficient to prevent SI. Consistent with this, the F1 population of an *At*-SI x *At*-  
147 *PrpS<sub>1</sub>/hld1-c1/2<sup>+/-</sup>* cross consisted of 99.5% *hld1<sup>+/-</sup>* heterozygous plants (n=358; **Fig 1E**),  
148 showing that it is almost exclusively *hld1* mutant pollen that transmits its genome to the next  
149 generation. When introgressed into the *At*-SI background line, *hld1-c1* and *hld1-c2* were both  
150 sufficient to cause a breakdown of SI upon self-pollination, comparable to those EMS  
151 mutagenesis-derived *hld1* alleles (**Figure S5B, C**). Our finding that CRISPR-generated  
152 mutations of *At3g27325* phenocopy the EMS-generated *hld1* mutant phenotype confirms that  
153 *At3g27325* is the causal gene for *hld1*-mediated SI suppression.

154

### 155 **SI-suppression by *hld1* does not depend on specific *S*-alleles**

156 Successful prevention of self-pollination by SI relies on a polymorphic *S*-locus involving *S*-  
157 specific self-recognition. Although the data presented so far show that *HLD1* regulates the  
158 *PrpS<sub>1</sub>-PrsS<sub>1</sub>*-based SI response, it was not clear if *HLD1* only regulates *PrpS<sub>1</sub>-PrsS<sub>1</sub>*-based SI,  
159 or if it acts as a genuine *S*-specific *Papaver* SI regulator. To examine if the *hld1* mutants regulate  
160 SI independent of specific *S*-alleles, we examined if the *hld1* mutation disrupted SI in plants  
161 expressing an alternative pair of cognate *S*-alleles, *PrpS<sub>3</sub>* and *PrsS<sub>3</sub>*. We introduced three *hld1*  
162 mutant alleles, *hld1-c1*, *hld1-c2*, and *hld1-7*, into a *pNTP303::PrpS<sub>3</sub>-GFP* line (*At-PrpS<sub>3</sub>*).  
163 Consistent with previous observations, when *Col-0* stigmas were pollinated with *Col-0*, or *At*-  
164 *PrpS<sub>3</sub>*, or *At-PrpS<sub>3</sub>/hld1* pollen, there was no significant difference observed in the silique  
165 length and number of seeds per silique<sup>19</sup>. Pollinating plants expressing the *PrsS<sub>3</sub>* in the stigma  
166 (*At-PrsS<sub>3</sub>*) with *At-PrpS<sub>3</sub>* pollen resulted in SI, with a significant reduction in silique length and  
167 almost no seed, compared with the control pollination ♀*At-PrsS<sub>3</sub>* x ♂*Col-0* (**Fig 2A, Fig S6**).  
168 In contrast, pollinating *At-PrsS<sub>3</sub>* with *At-PrpS<sub>3</sub>/hld1* pollen resulted in normal silique lengths  
169 and seed set (**Fig 2A, Fig S6**), demonstrating that mutation of the *HLD1* gene abolishes the  
170 *PrpS<sub>3</sub>-PrsS<sub>3</sub>*-based SI. These results demonstrate that *HLD1* regulates SI irrespective of the *S*-  
171 alleles involved.

172

### 173 **HLD1 regulates ectopic “SI” in Arabidopsis roots**

174 We recently established that expression of *PrpS<sub>1</sub>-PrsS<sub>1</sub>* in Arabidopsis roots triggers an ectopic  
175 “SI-like PCD” response in vegetative tissues, resulting in root growth inhibition and death of  
176 root cells<sup>22</sup>. To test if *HLD1* is necessary for this ectopic “SI-like PCD” response outside the  
177 reproductive context, we introduced *hld1-c1*, *hld1-c2* and *hld1-7* into the *pUBQ10::PrpS<sub>1</sub>*

178 transgenic line. While addition of recombinant PrsS<sub>1</sub> protein to plants carrying *pUBQ10::PrpS<sub>1</sub>*  
179 led to root growth arrest and cell death<sup>22</sup>, treatment of *pUBQ10::PrpS<sub>1</sub>/hld1* seedling roots with  
180 PrsS<sub>1</sub> showed no such effect (**Fig 2B-D**). This suppression of root growth inhibition and root  
181 cell death reveals that *HLD1* is not only required for SI, but also for the ectopic “SI-like PCD”  
182 response independent of the reproductive context.

183

### 184 ***HLD1* is a *HsPGAP1* ortholog**

185 *HLD1* contains a coding region of 3255 bp encoding a predicted protein of 1085 amino acids.  
186 Protein sequence analysis revealed that HLD1 contains a PGAP1-like domain (PFAM domain  
187 ID: PF07819), and is a putative PGAP1 homologue<sup>6,14</sup>. *PGAP1* has been identified in mammals  
188 and its orthologue, *Bypass of Sec Thirteen 1 (Bst1)* in yeast; it encodes a GPI inositol-deacylase.  
189 However, although the databases indicate the presence of *PGAP1*-like gene in plants, no  
190 analysis of *PGAP1* or the function of the protein it encodes has been made in plants to date.

191

192 To understand the evolution of the PGAP1 proteins, we constructed a phylogenetic tree of 631  
193 predicted PGAP1 protein homologues from > 300 eukaryotic species (**Fig S7A, B**). Two major  
194 phylogenetic clades were identified for plants; in Arabidopsis, HLD1 and another PGAP1-like  
195 domain containing protein At5g17670 were classified into two different clades (**Fig S7A**). The  
196 divergence of these two clades can be traced back to an ancient whole genome duplication event  
197 occurring before the radiation of extant Viridiplantae, including green algae and the land plants  
198 (**Fig S7A, B**)<sup>23</sup>. Comparison of the two homologous, HLD1 and At5g17670 from *A. thaliana*  
199 with *Homo sapiens* PGAP1, revealed that HLD1 has a slightly higher amino acid sequence  
200 similarity to *HsPGAP1* (23.3%) than At5g17670 (20.1%). Importantly, HLD1 shares a similar  
201 secondary protein structure to *HsPGAP1* while At5g17670 does not (**Fig S7C**). This suggests  
202 that HLD1 is likely to be the *HsPGAP1* ortholog in Arabidopsis<sup>6,14</sup>.

203

### 204 **HLD1 functions as a GPI-inositol deacylase**

205 Human PGAP1 is a GPI-inositol deacylase that removes the inositol acyl chain after the  
206 attachment of the GPI anchor to its target protein<sup>12</sup>. *HsPGAP1* is ubiquitously expressed in  
207 humans<sup>24</sup>, and likewise we found HLD1 expression in all the Arabidopsis tissues examined  
208 (**Fig S8, S9**)<sup>25</sup>. A key feature of PGAP1 is a catalytic serine-containing motif, V\*\*\*GHSMGG,  
209 in the PGAP1-like domain that is highly conserved across the eukaryotic kingdoms. The serine  
210 218, at the active site is also present in *HLD1* (**Figure 3A**). Mutation of *PGAP1* in mammals  
211 results in a “three-footed” structure of GPI-APs that retain an extra acyl chain in addition to the

212 two membrane-anchored non-polar fatty acid tails<sup>12</sup>. This particular conformation makes GPI-  
213 APs in the plasma membrane insensitive to cleavage-mediated release from the plasma  
214 membrane by phosphoinositide-specific phospholipase C (PI-PLC)<sup>12</sup>. We therefore attempted  
215 to establish the biochemical function of the Arabidopsis HLD1 by examining if a GPI-AP in  
216 the *hld1* mutant background contained the third inositol acyl chain and was resistant to PI-PLC  
217 treatment. To verify that HLD1 functions as a GPI-inositol deacylase, we introduced the *hld1*  
218 mutant into a line expressing GFP-tagged SKU5, which was adopted as a representative  
219 Arabidopsis GPI-AP localizing to the plasma membrane and cell wall<sup>26</sup>. A PI-PLC assay  
220 revealed that GFP-SKU5 was highly resistant to PI-PLC-mediated GPI cleavage and was not  
221 released from plasma membrane in the *hld1* mutant (**Fig 3B**). This result recapitulates  
222 analogous results obtained in mammalian *pgap1* knockouts<sup>9,12,27</sup> and supports the idea that  
223 *GFP-SKU5/hld1* has three tails in the GPI anchor and is therefore insensitive to PI-PLC  
224 treatment<sup>12</sup>, providing good evidence that HLD1 is an inositol deacylase and a functional  
225 ortholog of PGAP1.

226

### 227 ***HLD1* GPI-inositol deacylase function is required for SI**

228 To examine if HLD1 inositol deacylase activity is required for the SI response, we mutated the  
229 conserved serine 218 in the catalytic core of the PGAP1-like domain<sup>12</sup> (**Fig 3A**) to alanine  
230 (S218A), and cloned it into the pFAST-Green plasmid vector backbone<sup>28</sup>. The use of pFAST-  
231 Green facilitates the examination of transmission of gametes by simply checking the green  
232 fluorescence of the seeds. In segregating T2 seeds from heterozygous *At-SI/hld1/cHLD1* plants,  
233 only around 50% of the seeds were GFP positive. In contrast, heterozygous *At-*  
234 *SI/hld1/cHLD1(S218A)* plants displayed normal Mendelian segregation, with 75% GFP-  
235 positive T2 seeds, as expected for a full transmission via both germlines (**Fig 3C; Table S4**).  
236 This suggests that pollen containing the *cHLD1* transgene did not achieve fertilization and  
237 provides evidence for the failure of the S218A mutant allele to restore the SI response. This  
238 hypothesis was verified by the observation that almost no GFP positive seeds were found when  
239 *At-SI/hld1/cHLD1* pollen was pollinated onto *At-PrsS<sub>I</sub>* stigmas, which was not observed for *At-*  
240 *SI/hld1/cHLD1(S218A)* pollen. Thus, unlike the wild-type *HLD1* that rescued the *hld1*  
241 phenotype and restored SI, the inositol deacylase-defective S218A *HLD1* allele did not (**Fig**  
242 **3C; Table S4**). This demonstrates that the HLD1 inositol deacylase activity is essential for SI,  
243 implicating a requirement for correctly remodeled GPI-APs in this process.

244

### 245 **GPI-APs at the membrane is required for SI**

246 To test this hypothesis, we next examined if the absence of GPI-APs at the plasma membrane  
247 had a similar effect on SI as *hld1*. *SETH1* and *SETH2* are orthologs of *PIG-C* and *PIG-A* genes  
248 involved in early GPI biosynthesis, respectively; knockouts lack expression of GPI-APs at the  
249 plasma membrane<sup>5,27</sup>. We introduced *seth1-2* and *seth2* mutant alleles<sup>10</sup> into the *At-PrpS<sub>1</sub>*  
250 background. As loss of *SETH1* or *SETH2* function results in homozygote lethality<sup>10</sup>, we  
251 generated heterozygous *At-PrpS<sub>1</sub>/seth1-2<sup>+/-</sup>* and *At-PrpS<sub>1</sub>/seth2<sup>+/-</sup>* lines. Pollinating *At-PrpS<sub>1</sub>*  
252 stigmas with pollen from *At-PrpS<sub>1</sub>/seth1-2<sup>+/-</sup>* or *At-PrpS<sub>1</sub>/seth2<sup>+/-</sup>* plants produced short siliques  
253 without seeds, suggesting initially that mutations in these genes did not prevent the SI  
254 phenotype (**Fig 4A, Fig S10A**). However, consistent with previous report, *seth1-2* and *seth2*  
255 showed almost completely abolish pollen germination and tube growth (**Fig S10B**)<sup>10</sup>, thus  
256 potentially masking the role of these genes in SI. We therefore used the *in-vitro* SI bioassay<sup>29</sup>  
257 with ungerminated pollen to examine the effect of these mutants on pollen viability and cell  
258 death. Addition of recombinant PrsS<sub>1</sub> to *At-PrpS<sub>1</sub>/seth1-2<sup>+/-</sup>* or *At-PrpS<sub>1</sub>/seth2<sup>+/-</sup>* pollen,  
259 resulted in close to 50% pollen grain death in contrast to > 98% death in *At-PrpS<sub>1</sub>* pollen (**Fig**  
260 **4B, C, Fig S10C**). This demonstrates that *SETH1* or *SETH2* knockouts prevent SI-induced cell  
261 death and implicates the presence of GPI-APs at the plasma membrane being indispensable for  
262 SI-PCD.

263

#### 264 ***HLD1* mutation does not affect the expression levels of GPI-APs**

265 In mammals and yeast, GPI-inositol deacylation by PGAP1 homologs<sup>12</sup> is important for  
266 efficient sorting of GPI-APs to exit the ER<sup>5,30</sup>. However, knockout of *PGAP1* does not prevent  
267 transport of GPI-APs to the plasma membrane, so the precise functional significance of GPI  
268 deacylation remains unclear<sup>31</sup>. To examine if prevention of GPI inositol deacylation in the *hld1*  
269 mutant also fails to affect the expression of GPI-APs at the plasma membrane in plants, we  
270 examined GFP-SKU5 levels (**Fig S11A**). Imaging of GFP-SKU5 confirmed that the *HLD1*  
271 mutation had no obvious effect on GFP-SKU5 localization at the plasma membrane (**Fig 5A;**  
272 **Fig S11B**). Quantitation of the GFP-SKU5 signals revealed that the GFP-SKU5 protein levels  
273 in *hld1* mutant seedlings were not significantly different from the wild type (p=0.7995, n= 8;  
274 **Fig 5B**). This is consistent with the results of *PGAP1* knockout in animals<sup>12,27</sup> and is in line  
275 with our observation that the *hld1* mutants had no obvious effect on overall Arabidopsis  
276 development, except for slightly delayed onset of flowering (**Fig S12**). This contrasts with the  
277 homozygous *seth1/2* mutants, which are lethal, and *gpi8-1* mutants, which show reduced GPI-  
278 APs expression and disrupted plant growth (**Fig S12**)<sup>32</sup>. These results, demonstrating that *hld1*  
279 does not affect GPI-AP abundance at the plasma membrane, show that *hld1* is not likely to



280 affect SI due to failure of GPI-AP targeting to the plasma membrane, implying a role of GPI-  
281 AP remodeling in SI.

282

### 283 **Inositol deacylation by HLD1 is required for release of GPI-APs**

284 Besides their localization in the outer leaflet of the plasma membrane, many GPI-APs in  
285 mammals can be cleaved and released into the extracellular space; this can be mediated by  
286 phospholipase C (PLC) and is important for many cellular processes, including adhesion,  
287 proliferation, survival and oncogenesis<sup>9,13</sup>. In wild-type Arabidopsis, we detected GFP-SKU5  
288 in both the membrane and the soluble fraction (**Fig 5C**); this is consistent with a report that  
289 SKU5 can be cleaved and released into the apoplast<sup>26</sup>. In contrast, in the *hld1* mutant, GFP-  
290 SKU5 was exclusively detected in the membrane fraction (**Fig 5C**). Moreover, using a Triton  
291 X-114 assay, GFP-SKU5 was detected primarily in the aqueous phase in wild-type, whereas  
292 the majority of GFP-SKU5 was present in the detergent phase in the *hld1* mutant (**Fig S13**).  
293 These results demonstrate that in absence of HLD1, GFP-SKU5 is more hydrophobic and is  
294 retained at the plasma membrane. This provides evidence that release of GFP-SKU5 (and  
295 probably other GPI-APs) from the plasma membrane requires GPI inositol deacylation by  
296 HLD1.

297

### 298 **HLD1 regulates SI by affecting PLC-mediated release of GPI-APs**

299 As release of the GPI-AP SKU5 from the plasma membrane by GPI cleavage is prevented by  
300 the “three-footed” configuration in *PGAP1* mutants<sup>9,12,27</sup>, it is conceivable that the prevention  
301 of SI by the *HLD1* mutation is caused by a failure to release GPI-APs from the plasma  
302 membrane into the apoplast. Studies on *PGAP1* using animal cell lines lacking a GPI inositol  
303 deacylase showed that GPI-APs were resistant to PLC-mediated release, showing that this  
304 release can be mediated by PLC<sup>12</sup>. We therefore investigated this possibility further by testing  
305 whether inhibition of PLC activity might prevent SI in *At*-SI pollen. We applied three different  
306 phospholipase C inhibitors (U73122, ET-18-OCH<sub>3</sub>, and C48/80)<sup>33,34</sup> to the pollen *in vitro* SI-  
307 bioassay. As pollen tube growth requires PLC activity<sup>35,36</sup>, we could not test the effect of these  
308 inhibitors to see if they prevent SI-induced pollen tube growth inhibition, so we examined if  
309 the PLC inhibitors prevented the SI-induced death of pollen. *At-PrpS<sub>1</sub>* pollen pretreated with  
310 the PLC inhibitor U73122 significantly alleviated SI-induced cell death in a dose-dependent  
311 manner, with death reduced by ~40% at 10 μM (p<0.001), and by ~63% at 25 μM U73122 (**Fig**  
312 **5D**, p<0.001). Pretreatment with the other two PLC inhibitors, ET-18-OCH<sub>3</sub>, and C48/80,  
313 showed similar alleviation of SI-induced pollen death in a dose-dependent manner (**Fig S14**).

314 This reduction in death rates by PLC inhibitor treatment demonstrates that PLC activity is  
315 important for SI-induced pollen death, suggesting an important role of PLC-mediated release  
316 of GPI-APs from the plasma membrane in the SI response. As SI is prevented by the “three-  
317 footed” GPI-AP configuration resulting from the *HLDI* mutation, our evidence is not only  
318 consistent with the idea that GPI-APs play a key role in SI, but that specifically the prevention  
319 of their release from the plasma membrane is responsible for the breakdown of SI in the *hldl*  
320 mutant plants.

321

## 322 **Discussion**

323 We identified *HLDI*, a previously uncharacterized plant *PGAP1* ortholog that is essential for  
324 the *Papaver* SI-response. We provide evidence that GPI anchoring, and specifically GPI  
325 deacylation of GPI-APs, is essential for the SI response. Although a putative *PGAP1* ortholog  
326 has been identified in the Arabidopsis genome databases<sup>6,14</sup>, our study provides the first  
327 functional analysis of a GPI-remodeling protein in plants. In animals, rather little is known  
328 about the physiological functions of PGAP1 apart from its biochemical role in deacylation in  
329 the GPI-anchoring pathway<sup>12</sup> and pathological consequences of PGAP1 mutations<sup>27,31,37,38</sup>.  
330 *PGAP1* knock-out mice display serious developmental defects<sup>31</sup> and humans with a null  
331 mutation in *PGAP1* suffer from intellectual disabilities and encephalopathy<sup>27,31,37,38</sup>. This shows  
332 that retention of an extra acyl chain in GPI anchors causes severe developmental defects in  
333 mammals. In contrast, in plants lack of GPI deacylation does not produce grave developmental  
334 defects, but specifically interferes with the SI process in *At*-SI lines. As it has been proposed  
335 that the lack of GPI deacylation disturbs GPI anchor-mediated signal transduction<sup>31</sup>, prevention  
336 of deacylation in the *hldl* mutants may affect cell-cell signaling involved in SI. Intriguingly,  
337 our data suggest that the cleavage and membrane release of GPI-APs may play an important  
338 functional role in this context. As release of GPI-APs from the plasma membrane by GPI  
339 cleavage is prevented by the “three-footed” configuration in *PGAP1* mutants<sup>9,12,27</sup>, and as we  
340 showed that PLC inhibitors alleviate SI-induced death, our data are consistent with the idea that  
341 prevention of SI by the *HLDI* mutation is caused by a failure to release GPI-APs from the  
342 plasma membrane into the apoplast. This suggests an important role for the release of GPI-APs  
343 from the plasma membrane in this SI response.

344

345 Our identification of *HLDI* implicates an involvement of GPI-APs in the SI response. As *seth*  
346 mutants have the same detrimental effect on SI as *hldl* mutants, the presence of GPI-APs at the  
347 plasma membrane appears to be crucial (**Fig 5E**); While PrpS itself is clearly not a GPI-AP, so

348 cannot be a substrate of HLD1<sup>39</sup>, PrpS functions might be regulated by GPI-APs (**Fig 5E**). In  
349 mammalian cells, GPI-APs are involved in key events such as embryogenesis, development,  
350 and fertilization<sup>8</sup>. Over 250 GPI-APs have been predicted in Arabidopsis<sup>4,40</sup>; though despite  
351 recent advances in our knowledge of GPI-APs in plants, information on their functional roles  
352 remains limited. There is currently intense interest in plant GPI-APs, as they play a key role in  
353 cell-cell signalling, through association with partner receptor-like kinases<sup>41-43</sup>. It appears that  
354 broadly expressed GPI-APs, rather than those specifically involved in reproduction, are  
355 involved in SI, as the ectopic “SI-like PCD” response in Arabidopsis roots also requires *HLD1*.  
356 Our study opens up new avenues for research into the involvement and regulation of GPI  
357 anchoring in SI, investigation of the GPI-anchoring pathway and the identity and roles of GPI-  
358 APs in plant signalling processes in general.

359

360

## 361 References

- 362 1 Ferguson, M. A. J. & Williams, A. F. Cell-surface anchoring of proteins via glycosyl-  
363 phosphatidylinositol structures. *Annual Review of Biochemistry* **57**, 285-320,  
364 doi:10.1146/annurev.bi.57.070188.001441 (1988).
- 365 2 Low, M. & Saltiel, A. Structural and functional roles of glycosyl-phosphatidylinositol in  
366 membranes. *Science* **239**, 268-275, doi:10.1126/science.3276003 (1988).
- 367 3 Borner, G. H. H., Lilley, K. S., Stevens, T. J. & Dupree, P. Identification of  
368 Glycosylphosphatidylinositol-Anchored Proteins in Arabidopsis. A Proteomic and Genomic  
369 Analysis. *Plant Physiology* **132**, 568-577, doi:10.1104/pp.103.021170 (2003).
- 370 4 Zhou, K. Glycosylphosphatidylinositol-Anchored Proteins in Arabidopsis and One of Their  
371 Common Roles in Signaling Transduction. *Frontiers in Plant Science* **10**,  
372 doi:10.3389/fpls.2019.01022 (2019).
- 373 5 Fujita, M. & Kinoshita, T. GPI-anchor remodeling: Potential functions of GPI-anchors in  
374 intracellular trafficking and membrane dynamics. *Biochimica et Biophysica Acta (BBA) -*  
375 *Molecular and Cell Biology of Lipids* **1821**, 1050-1058,  
376 doi:https://doi.org/10.1016/j.bbalip.2012.01.004 (2012).
- 377 6 Desnoyer, N. & Palanivelu, R. Bridging the GAPs in plant reproduction: a comparison of plant  
378 and animal GPI-anchored proteins. *Plant Reproduction*, doi:10.1007/s00497-020-00395-9  
379 (2020).
- 380 7 Gillmor, C. S. *et al.* Glycosylphosphatidylinositol-Anchored Proteins Are Required for Cell Wall  
381 Synthesis and Morphogenesis in Arabidopsis. *The Plant Cell* **17**, 1128-1140,  
382 doi:10.1105/tpc.105.031815 (2005).
- 383 8 Lopez, S., Rodriguez-Gallardo, S., Sabido-Bozo, S. & Muñiz, M. Endoplasmic Reticulum Export  
384 of GPI-Anchored Proteins. **20**, doi:10.3390/ijms20143506 (2019).
- 385 9 Kinoshita, T. Biosynthesis and biology of mammalian GPI-anchored proteins. *Open Biology* **10**,  
386 190290, doi:doi:10.1098/rsob.190290 (2020).
- 387 10 Lalanne, E. *et al.* SETH1 and SETH2, two components of the glycosylphosphatidylinositol  
388 anchor biosynthetic pathway, are required for pollen germination and tube growth in  
389 Arabidopsis. *Plant Cell* **16**, 229-240, doi:10.1105/tpc.014407 (2004).

- 390 11 Bellai-Dussault, K., Nguyen, T. T. M., Baratang, N. V., Jimenez-Cruz, D. A. & Campeau, P. M.  
391 Clinical variability in inherited glycosylphosphatidylinositol deficiency disorders. *Clinical*  
392 *genetics* **95**, 112-121, doi:10.1111/cge.13425 (2019).
- 393 12 Tanaka, S., Maeda, Y., Tashima, Y. & Kinoshita, T. Inositol deacylation of  
394 glycosylphosphatidylinositol-anchored proteins is mediated by mammalian PGAP1 and yeast  
395 Bst1p. *The Journal of biological chemistry* **279**, 14256-14263, doi:10.1074/jbc.M313755200  
396 (2004).
- 397 13 Fujihara, Y. & Ikawa, M. GPI-AP release in cellular, developmental, and reproductive biology.  
398 *Journal of Lipid Research* **57**, 538-545, doi:10.1194/jlr.R063032 (2016).
- 399 14 Luschnig C. & G.J., S. *Posttranslational Modifications of Plasma Membrane Proteins and Their*  
400 *Implications for Plant Growth and Development.*, (Springer, 2011).
- 401 15 Takayama, S. & Isogai, A. Self-incompatibility in plants. *Annual Review of Plant Biology* **56**, 467-  
402 489 (2005).
- 403 16 Foote, H. C. C. *et al.* Cloning and Expression of a Distinctive Class of Self- Incompatibility (S)  
404 Gene from *Papaver rhoeas* L. *Proc. Natl. Acad. Sci. U. S. A.* **91**, 2265-2269 (1994).
- 405 17 Wheeler, M. J. *et al.* Identification of the pollen self-incompatibility determinant in *Papaver*  
406 *rhoeas*. *Nature* **459**, 992-995, doi:10.1038/nature08027 (2009).
- 407 18 Wilkins, K. A., Poulter, N. S. & Franklin-Tong, V. E. Taking one for the team: self-recognition  
408 and cell suicide in pollen. *Journal of Experimental Botany* **65**, 1331-1342,  
409 doi:10.1093/jxb/ert468 (2014).
- 410 19 Lin, Z., Eaves, D. J., Sanchez-Moran, E., Franklin, F. C. H. & Franklin-Tong, V. E. The *Papaver*  
411 *rhoeas* S-determinants confer self-incompatibility to *Arabidopsis thaliana* in planta. *Science*  
412 **350**, 684-687, doi:10.1126/science.aad2983 (2015).
- 413 20 de Graaf, Barend H. *et al.* The *Papaver* Self-Incompatibility Pollen S-Determinant, PrpS,  
414 Functions in *Arabidopsis thaliana*. *Current Biology* **22**, 154-159, doi:10.1016/j.cub.2011.12.006  
415 (2012).
- 416 21 Schneeberger, K. *et al.* SHOREmap: simultaneous mapping and mutation identification by deep  
417 sequencing. *Nature Methods* **6**, 550-551, doi:10.1038/nmeth0809-550 (2009).
- 418 22 Lin, Z. *et al.* Ectopic Expression of a Self-Incompatibility Module Triggers Growth Arrest and  
419 Cell Death in Vegetative Cells. *Plant Physiology* **183**, 1765-1779, doi:10.1104/pp.20.00292  
420 (2020).
- 421 23 Leebens-Mack, J. H. *et al.* One thousand plant transcriptomes and the phylogenomics of green  
422 plants. *Nature* **574**, 679-685, doi:10.1038/s41586-019-1693-2 (2019).
- 423 24 Uhlén, M. *et al.* Proteomics. Tissue-based map of the human proteome. *Science* **347**, 1260419,  
424 doi:10.1126/science.1260419 (2015).
- 425 25 Mergner, J. & Frejno, M. Mass-spectrometry-based draft of the *Arabidopsis* proteome. **579**,  
426 409-414, doi:10.1038/s41586-020-2094-2 (2020).
- 427 26 Sedbrook, J. C., Carroll, K. L., Hung, K. F., Masson, P. H. & Somerville, C. R. The *Arabidopsis*  
428 *SKU5* Gene Encodes an Extracellular Glycosyl Phosphatidylinositol-Anchored Glycoprotein  
429 Involved in Directional Root Growth. *The Plant Cell* **14**, 1635-1648, doi:10.1105/tpc.002360  
430 (2002).
- 431 27 Murakami, Y. *et al.* Null mutation in PGAP1 impairing Gpi-anchor maturation in patients with  
432 intellectual disability and encephalopathy. *PLoS genetics* **10**, e1004320,  
433 doi:10.1371/journal.pgen.1004320 (2014).
- 434 28 Shimada, T. L., Shimada, T. & Hara-Nishimura, I. A rapid and non-destructive screenable  
435 marker, FAST, for identifying transformed seeds of *Arabidopsis thaliana*. *The Plant journal : for*  
436 *cell and molecular biology* **61**, 519-528, doi:10.1111/j.1365-313X.2009.04060.x (2010).
- 437 29 Franklin-Tong, V. E., Lawrence, M. J. & Franklin, F. C. H. An *in vitro* Bioassay for the Stigmatic  
438 Product of the Self- Incompatibility Gene in *Papaver rhoeas* L. *New Phytol.* **110**, 109-118  
439 (1988).
- 440 30 Fujita, M. *et al.* GPI glycan remodeling by PGAP5 regulates transport of GPI-anchored proteins  
441 from the ER to the Golgi. *Cell* **139**, 352-365, doi:10.1016/j.cell.2009.08.040 (2009).

- 442 31 Ueda, Y. *et al.* PGAP1 Knock-out Mice Show Otocephaly and Male Infertility. *Journal of*  
443 *Biological Chemistry* **282**, 30373-30380, doi:10.1074/jbc.M705601200 (2007).
- 444 32 Bundy, M. G. R. *et al.* A Mutation in the Catalytic Subunit of the Glycosylphosphatidylinositol  
445 Transamidase Disrupts Growth, Fertility, and Stomata Formation. *Plant Physiology* **171**, 974-  
446 985, doi:10.1104/pp.16.00339 (2016).
- 447 33 Bronner, C. *et al.* Compound 48/80 is a potent inhibitor of phospholipase C and a dual  
448 modulator of phospholipase A2 from human platelet. *Biochimica et Biophysica Acta (BBA) -*  
449 *Lipids and Lipid Metabolism* **920**, 301-305, doi:[https://doi.org/10.1016/0005-2760\(87\)90108-](https://doi.org/10.1016/0005-2760(87)90108-1)  
450 1 (1987).
- 451 34 Powis, G. *et al.* Selective Inhibition of Phosphatidylinositol Phospholipase C by Cytotoxic Ether  
452 Lipid Analogues. *Cancer Research* **52**, 2835-2840 (1992).
- 453 35 Helling, D., Possart, A., Cottier, S., Klahre, U. & Kost, B. Pollen Tube Tip Growth Depends on  
454 Plasma Membrane Polarization Mediated by Tobacco PLC3 Activity and Endocytic Membrane  
455 Recycling. *The Plant Cell* **18**, 3519-3534, doi:10.1105/tpc.106.047373 (2006).
- 456 36 Dowd, P. E., Coursol, S., Skirpan, A. L., Kao, T.-h. & Gilroy, S. *Petunia* phospholipase c1 is  
457 involved in pollen tube growth. *The Plant cell* **18**, 1438-1453, doi:10.1105/tpc.106.041582  
458 (2006).
- 459 37 Bosch, D. G. M. *et al.* Cerebral visual impairment and intellectual disability caused by PGAP1  
460 variants. *European Journal of Human Genetics* **23**, 1689-1693, doi:10.1038/ejhg.2015.42  
461 (2015).
- 462 38 Kettwig, M. *et al.* Compound heterozygous variants in PGAP1 causing severe psychomotor  
463 retardation, brain atrophy, recurrent apneas and delayed myelination: a case report and  
464 literature review. *BMC Neurology* **16**, 74, doi:10.1186/s12883-016-0602-7 (2016).
- 465 39 Gíslason, M. H., Nielsen, H., Almagro Armenteros, J. J. & Johansen, A. R. Prediction of GPI-  
466 anchored proteins with pointer neural networks. *Current Research in Biotechnology* **3**, 6-13,  
467 doi:<https://doi.org/10.1016/j.crbiot.2021.01.001> (2021).
- 468 40 Yeats, T. H., Bacic, A. & Johnson, K. L. Plant glycosylphosphatidylinositol anchored proteins at  
469 the plasma membrane-cell wall nexus. *Journal of Integrative Plant Biology* **60**, 649-669,  
470 doi:<https://doi.org/10.1111/jipb.12659> (2018).
- 471 41 Duan, Q., Kita, D., Li, C., Cheung, A. Y. & Wu, H.-M. FERONIA receptor-like kinase regulates RHO  
472 GTPase signaling of root hair development. *Proceedings of the National Academy of Sciences*  
473 **107**, 17821-17826, doi:10.1073/pnas.1005366107 (2010).
- 474 42 Tsukamoto, T., Qin, Y., Huang, Y., Dunatunga, D. & Palanivelu, R. A role for LORELEI, a putative  
475 glycosylphosphatidylinositol-anchored protein, in *Arabidopsis thaliana* double fertilization and  
476 early seed development. *The Plant Journal* **62**, 571-588, doi:10.1111/j.1365-  
477 313X.2010.04177.x (2010).
- 478 43 Li, C., Wu, H.-M. & Cheung, A. Y. FERONIA and Her Pals: Functions and Mechanisms. *Plant*  
479 *Physiology* **171**, 2379-2392, doi:10.1104/pp.16.00667 (2016).

480

481 **Acknowledgements:** We thank members of the PCD laboratory for critical comments on the  
482 manuscript, and Ms. Freya De Winter for technical assistance. This research was financially  
483 supported by the European Research Council (ERC) StG PROCELLDEATH 639234 and  
484 CoG EXECUT.ER 864952 (MKN), Biotechnology, Biological Sciences Research Council  
485 (BBSRC) grant BB/P005489/1 (VEF-T, MB), Fonds Wetenschappelijk Onderzoek (FWO)  
486 grant G011215N (MT), FWO grant 12I7417N (ZL), Chinese Scholarship Council (CSC)  
487 grant 201806760049 (FX).

488  
489  
490 **Author Contributions:** ZL, MKN, VEF-T, and MB designed the study. ZL, FX, and MT  
491 performed the research and analyzed data. ZT contributed to the PGAP1 phylogeny analysis.  
492 FC and LS contributed to the analysis of WGS data. ZL, VEF-T, MKN and MB wrote the  
493 manuscript with input from all the other authors.

494  
495  
496 **Competing interests:** The authors declare no conflict of interest.

497  
498  
499 **Data and materials availability:** All data generated or analyzed during this study are included  
500 in this published article (and its supplementary information files). All the materials used in this  
501 study will be freely available to the scientific community upon request under MTA.

502  
503  
504 **Accession numbers:** Sequence data from this article can be found in the GenBank/EMBL data  
505 libraries under accession numbers: *AtGPI8*(*At1g08750*); *AtPGAP1/HLD1* (*At3g27325*);  
506 *SETH1* (*At2g34980*); *SETH2* (*At3g45100*); *UBQ10* (*At4g05320*).

507  
508  
509 **Supplementary Information:**  
510 Materials and Methods  
511 Figs. S1 to S14  
512 Tables. S1 to S5  
513 References for Materials and Methods (refs <sup>44-55</sup>)  
514

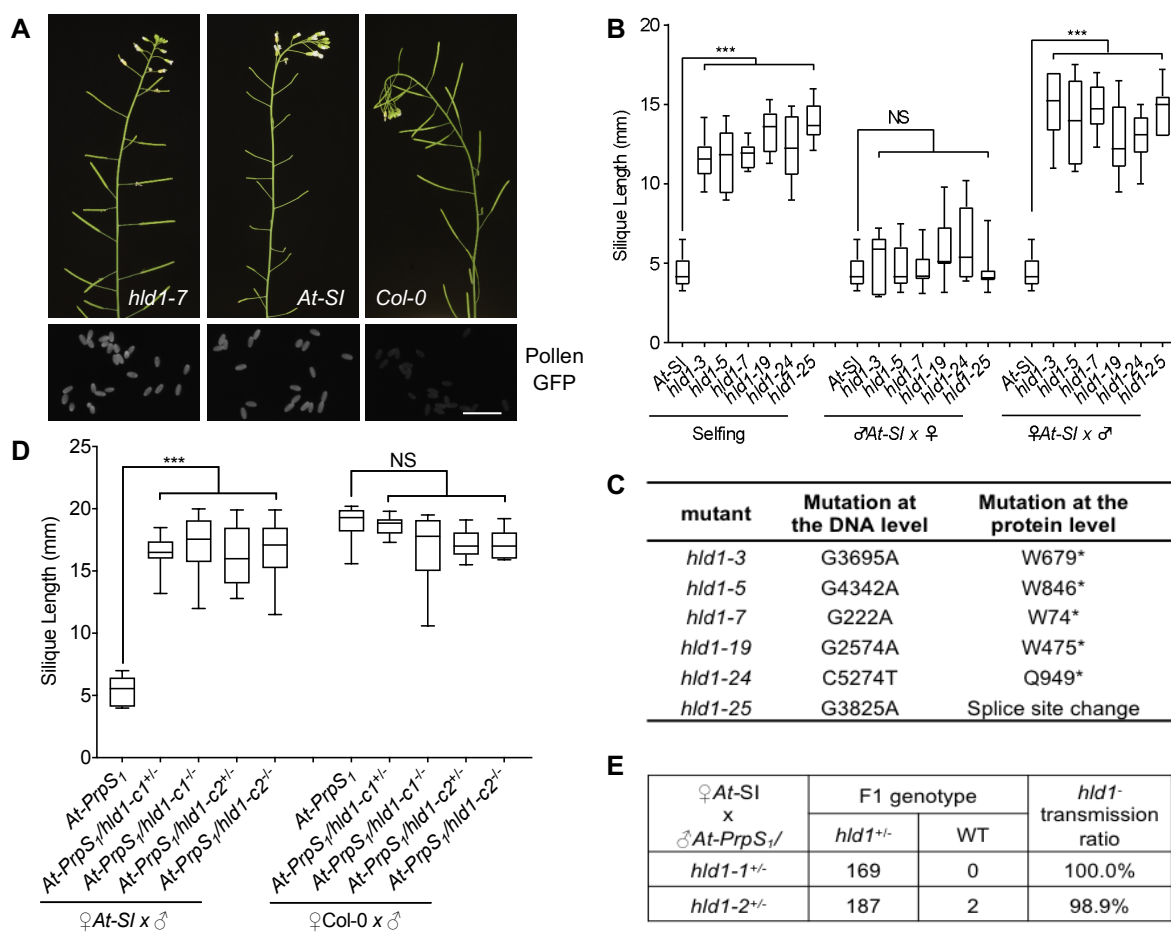

515  
 516 **Fig. 1. Identification of *hld1* as a male gametophytic mutant that overcomes SI.**  
 517 (A) *hld1* was identified from an EMS mutagenesis screen. Mutants were screened for a  
 518 defective SI phenotype, with normal seed set. Upper panel: Inflorescences from *hld1-7* mutants  
 519 had normal seed set like WT *Col-0* plants, in contrast to *At-SI*. Lower panel: PrpS<sub>1</sub>-GFP signals  
 520 in *hld1* mutant pollen are similar to those in *At-SI* pollen. Bar = 100 μm.  
 521 (B) *hld1* mutants have pollen defects. *hld1* stigmas were pollinated with self-pollen (selfing)  
 522 or *At-SI* pollen (♂*At-SI* x ♀) and *At-SI* stigmas pollinated with *hld1* pollen (♀*At-SI* x ♂). *At-*  
 523 *SI* stigmas pollinated with *At-SI* pollen acted as the SI controls for these pollinations. Silique  
 524 length measurements (B) and number of seeds per silique (Fig S2C) showed that the *hld1*  
 525 mutants used as the male parent had significantly longer silique lengths and higher seed-set  
 526 than the *At-SI* parent line. *hld1* mutants used as the female parent pollinated with *At-SI* pollen  
 527 displayed a normal SI phenotype of short silique lengths and low seed set. N=9-11. One-way  
 528 ANOVA. \*\*\*: p<0.001. NS: not-significant, p>0.05.  
 529 (C) Six different *At3g27325* mutant alleles were identified for the *hld1* mutants through  
 530 WGS. \* indicates stop codon.  
 531 (D) Mutation of *At3g27325* phenocopies *hld1*. *At-SI* or *Col-0* stigmas were pollinated with  
 532 *At-PrpS1* pollen containing the CRISPR/Cas9-derived *At3g27325* mutant allele (*hld1-c1* or  
 533 *hld1-c2*). Significant increases in both the silique lengths (C) and seed set (Fig S5A) were  
 534 observed when *At3g27325* was mutated, in both heterozygous and homozygous mutants. N=12-  
 535 16. One-way ANOVA. \*\*\*: p<0.001. NS: not-significant, p>0.05.  
 536 (E) *hld1* mutants are male gametophytic mutants. Segregation analysis of the F1 population  
 537 of ♀*At-SI* x ♂*At-PrpS1/hld1*<sup>+/-</sup> showed that ~100% of the progenies are *hld1* heterozygous  
 538 mutants, demonstrating that when pollinated on *At-SI* stigmas, only *hld1* mutant pollen can  
 539 bypass the SI response, resulting in successful fertilization and seed set.

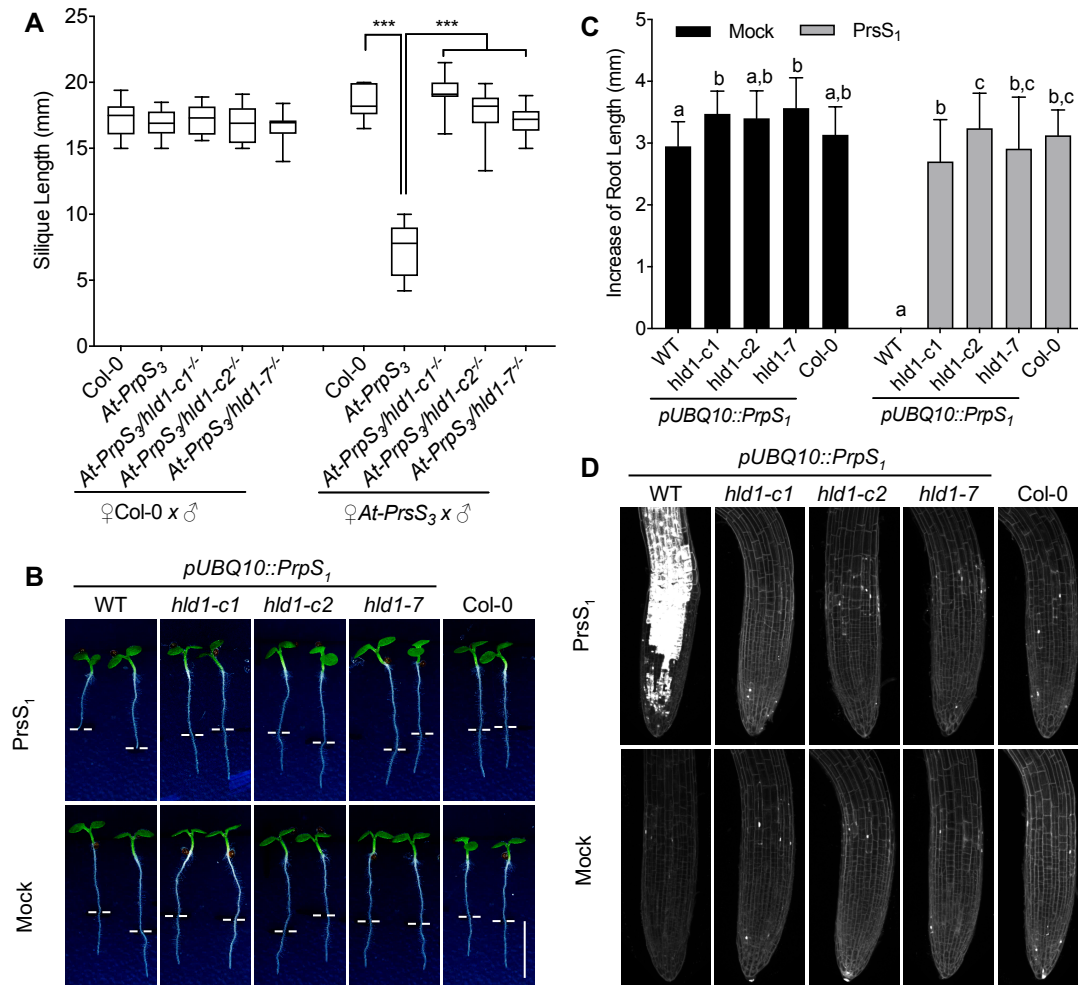

540  
541

**Fig. 2. HLD1 regulates SI in an S-specific manner and regulates ectopic "SI" in roots.**

(A) **HLD1 regulates SI in an S-specific manner.** *At-PrpS<sub>3</sub>* pollen containing *hld1-c1*, *hld1-c2*, or *hld1-7* mutant allele were pollinated onto *At-PrsS<sub>3</sub>* or Col-0 stigmas. Silique lengths (A) and seed set (Fig S6) were measured. N=10-20. One-way ANOVA. \*\*\*. p<0.001.

(B-D) **HLD1 regulates ectopic "SI" in Arabidopsis roots.** (B) Treatment of *pUBQ10::PrpS<sub>1</sub>* seedlings with PrsS<sub>1</sub> resulted in root growth inhibition; in contrast, when *pUBQ10::PrpS<sub>1</sub>/hld1* seedlings were given the same treatment, no inhibition was observed (upper panel). Mock treatment did not affect any of the seedling roots (lower panel). White lines indicate the position of root tips when treated. Bar = 0.5 cm. The increases of root length 24h after treatment were quantified in (C). 12-20 seedlings from three independent experiments were documented for each treatment. Results = mean ± SD. One-way ANOVA with multiple comparison test. Different letters indicate p<0.05. (D) Treatment of *pUBQ10::PrpS<sub>1</sub>* seedlings with PrsS<sub>1</sub> resulted in root cell death indicated by PI signals (white). However, when *pUBQ10::PrpS<sub>1</sub>/hld1* seedlings were treated with PrsS<sub>1</sub> proteins, no cell death was observed, comparable with what was observed for *Col-0* seedlings. Bar = 100 μm.



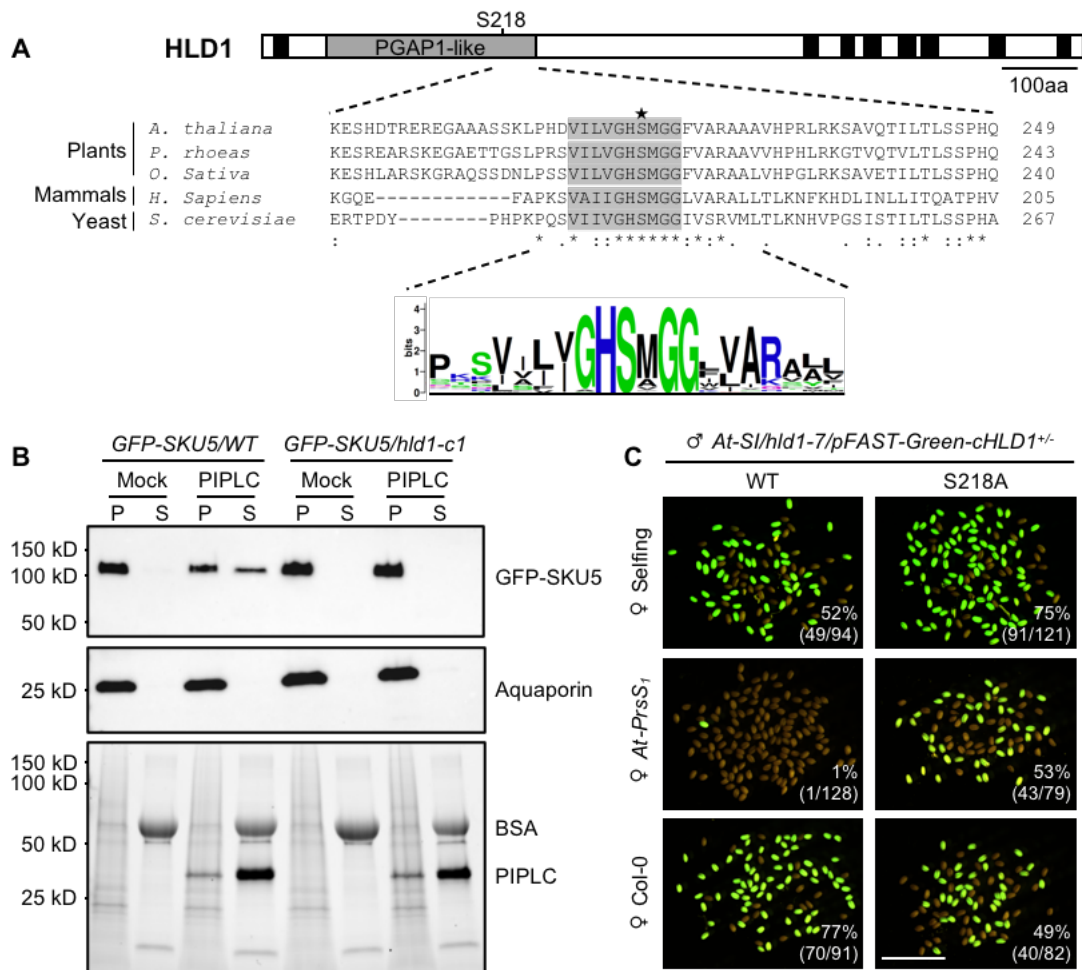

**Fig. 3. HLD1 is a GPI inositol deacylase and its lipase activity is required for the SI response.**

(A) **The lipase motif in the PGAP1-like domain is highly conserved across the eukaryotic kingdoms.** Upper panel: cartoon of HLD1 protein secondary structure. The PGAP1-like domain is indicated by the grey box. Black boxes indicate transmembrane domains. Middle panel: amino acid sequence alignment around the conserved lipase motif in the PGAP1-like domain in several higher plants, human and yeast. The grey box indicates the lipase motif with the catalytic site Serine 218 indicated (star). Bottom panel: amino acid motif logo shows that the lipase motif of the PGAP1-like domain is conserved across eukaryotic kingdoms.

(B) **HLD1 functions as a GPI inositol deacylase.** GFP-SKU5 was enriched in the pellet (P) fractions in both wildtype (WT) and *hld1* mutants in the mock (buffer control) treatment. PI-PLC treatment resulted in the GFP-SKU5 being found in the soluble (S) fraction in WT samples, showing cleavage by PI-PLC, while in the *hld1* mutants, GFP-SKU5 remained in the pellet, demonstrating that in the *hld1* mutant this GPI-AP was resistant to PI-PLC treatment. This supports the idea that in the *hld1* mutant a persistent inositol-linked acyl chain makes them insensitive to cleavage by PI-PLC.

(C) **HLD1 lipase activity is required for the SI response.** *Hld1* mutants were transformed with *pHLD1::mCherry-cHLD1* or *pHLD1::mCherry-cHLD1(S218A)* cloned in the pFAST-Green plasmid vector backbone. Representative images of seeds resulting from pollinations by pollen from T1 heterozygous plants onto self-stigmas (upper panel), *At-PrsS1* stigmas (middle panel) or *Col-0* stigmas (lower panel). GFP signals report the pollen transmission in the seeds in the F1 generation. Numbers indicate the ratio of GFP-positive seeds (number of GFP seeds/total seeds). Bar = 5 mm.

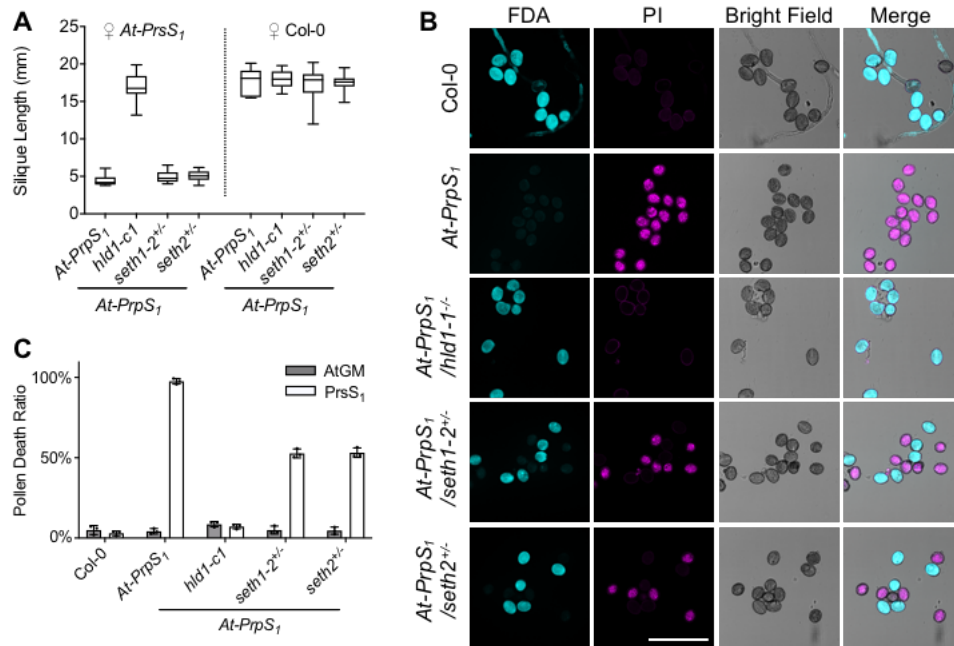

581  
582  
583  
584  
585  
586  
587  
588  
589  
590  
591  
592  
593  
594  
595  
596

**Fig. 4. The GPI-anchoring pathway is involved in the regulation of SI-induced death of pollen**

(A) **Mutation of GPI-anchoring pathway genes does not phenocopy the hld1 mutant phenotype.** GPI-anchoring pathway mutants, *seth1-2* and *seth2*, were introduced into *At-PrpS<sub>1</sub>* background, and the pollen were pollinated onto *At-PrpS<sub>1</sub>* or Col-0 stigmas. Pollinating *At-PrpS<sub>1</sub>* stigmas with *At-PrpS<sub>1</sub>/seth1<sup>+/-</sup>* or *At-PrpS<sub>1</sub>/seth2<sup>+/-</sup>* pollen resulted in short siliques (A) and no seedset (Fig S10A). This is in consistent with the observation that *seth1-2* and *seth2* abolished the pollen fertilization ability, showing almost no transmission (Fig S10B). N=13-17.

(B-C) **Mutation of GPI-anchoring pathway genes resulted in the alleviation of SI-induced PCD.** *At-PrpS<sub>1</sub>/seth1<sup>+/-</sup>* and *At-PrpS<sub>1</sub>/seth2<sup>+/-</sup>* pollen were treated with PrsS<sub>1</sub> proteins (B) or Mock buffer control (Fig S10C). The samples were co-stained with FDA and PI 6h after treatment. Bar = 100 μm. The PI positive ratios were quantified in (C). Three independent experiments were carried out. In each experiment, 100-200 pollen grains were counted for each of the sample.

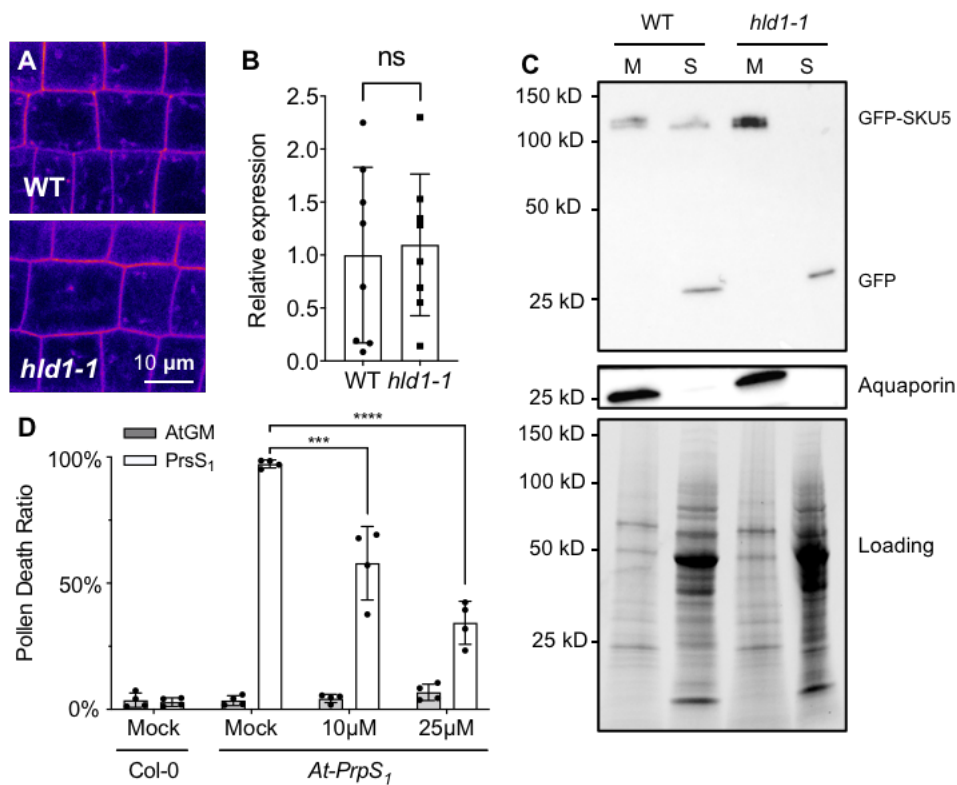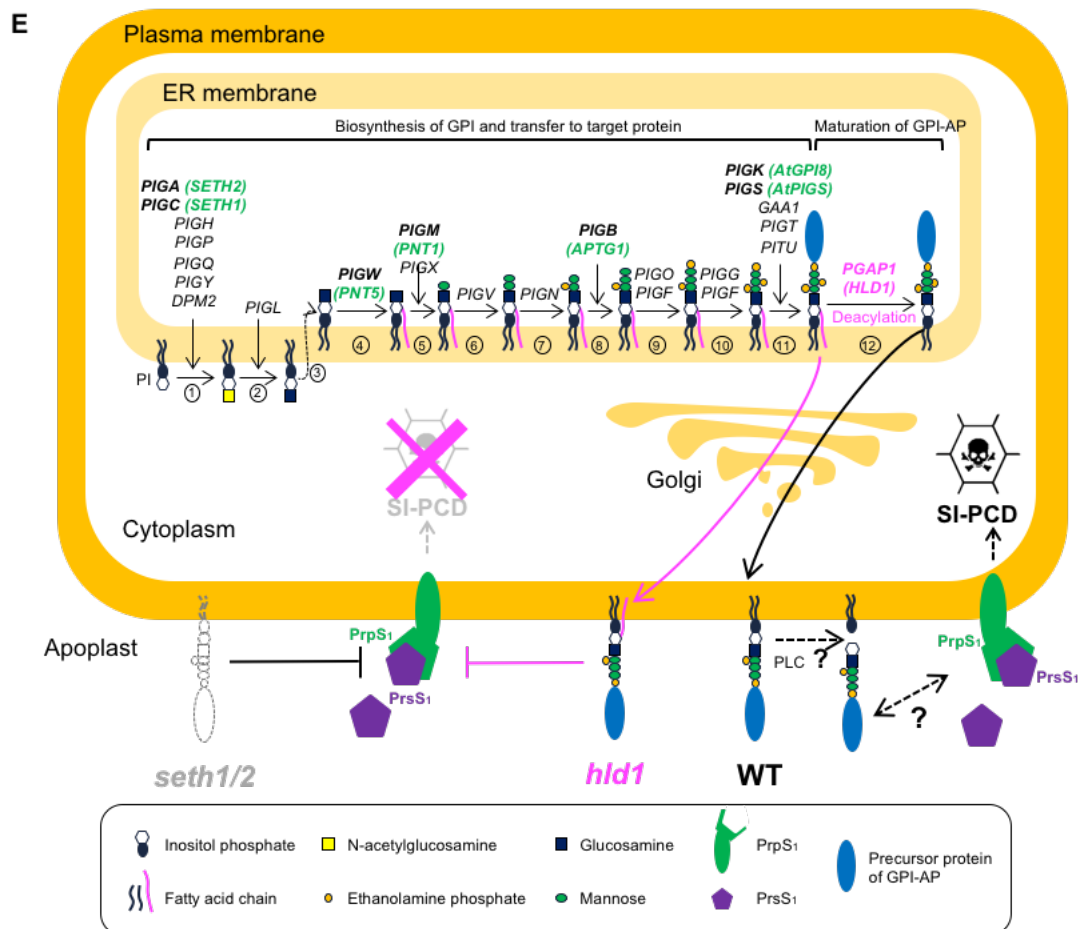

597

598 **Fig. 5. HLD1 regulates SI by affecting PLC-mediated release of GPI-APs.**

599 (A-B) **Mutation of HLD1 does not affect GFP-SKU5 protein expression level and**  
600 **localization.** (A) Representative confocal images (single Z slice) of GFP-SKU5 signals of 4-  
601 day-old *GFP-SKU5/WT* or *GFP-SKU5/hld1-1* seedlings. (B) Quantitation of the protein  
602 expression level of GFP-SKU5 using western blot analysis of F3 seedlings derived from 16 F2  
603 double homozygous siblings of the cross ♀*hld1-1* x ♂*GFP-SKU5*. Tubulin was used as an  
604 internal control. Quantification revealed that GFP-SKU5 protein expression level was not  
605 altered by the HLD1 mutation ( $p=0.7995$ , Students t test). These data show that this GPI-AP  
606 was still targeted to the plasma membrane in the *hld1-1* mutant plants that lack inositol  
607 deacylase activity.

608 (C) **The HLD1 mutation inhibits the cleavage and release of GFP-SKU5 from the plasma**  
609 **membrane.** GFP-SKU5/WT and GFP-SKU5/*hld1* proteins were extracted, separated into  
610 membrane (M) and soluble, supernatant (S) fractions, and analyzed using western blots. In the  
611 WT samples, GFP-SKU5 was detected in both membrane and soluble fractions; in contrast, the  
612 *hld1* mutant, GFP-SKU5 was only observed in the membrane fraction. This provides evidence  
613 that cleavage and release of GPI-APs from the plasma membrane is prevented in the *hld1-1*  
614 mutant.

615 (D) **The PLC inhibitor U73122 treatment inhibits SI-induced pollen death.** *Col-0* and *At-*  
616 *PrpS<sub>1</sub>* pollen that were “mock treated” with Arabidopsis pollen germination medium (AtGM)  
617 exhibited low levels of death; *At-PrpS<sub>1</sub>* pollen treated with recombinant PrsS<sub>1</sub> had high levels  
618 of death, and U73122 alleviated death in a dose-dependent manner. This suggests that cleavage  
619 of GPI-APs by PLC is an important requirement for mediating SI-induced death of pollen.

620 (E) **Cartoon of key events in GPI-AP biosynthesis/maturation and how *pgap1/hld1* affects**  
621 **self-incompatibility.** GPI-anchoring is a post-translational modification involving several  
622 phases which have been established in mammals and yeast. First, biosynthesis of the GPI  
623 involves a series of events [steps 1-10]. Once the core GPI is assembled [step 10], the target  
624 precursor protein (blue sphere) is transferred to the GPI by a GPI transamidase complex [step  
625 11]. The nascent immature GPI-AP then undergoes remodeling; the first of these is deacylation  
626 [step 12], involving PGAP1, which we identified in this study as HLD1 (indicated in pink).  
627 After this several other PGAP genes (not shown) mediate further modification during the  
628 transport from ER to the Golgi and then to the plasma membrane. The genes involved identified  
629 in humans are indicated in black; genes identified in plants are indicated in green. Knockouts  
630 of genes early in the biosynthetic pathway in mammals result in lack of expression of GPI-APs  
631 at the plasma membrane<sup>5,27</sup>; in plants homozygous knockouts of the orthologs of *PIG-C* and  
632 *PIG-A*, *SETH1* and *SETH2*, are lethal.

633 Our data show that correctly modified GPI-APs at the plasma membrane are crucial for the  
634 *Papaver* SI response. This SI response is controlled by interaction of membrane-bound PrpS  
635 and secreted PrsS. Interaction of cognate PrpS-PrsS triggers the SI-response leads to growth  
636 arrest and programmed cell death (PCD) specifically of “self”-pollen. This SI-PCD response is  
637 prevented in GPI biosynthesis and GPI-remodeling mutants. When interfering with GPI  
638 biosynthesis by *SETH1* or *SETH2* mutation no SI-PCD occurs, suggesting that presence of  
639 GPI-APs at the plasma membrane are required for SI. The GPI-remodeler HLD1 removes the  
640 acyl chain linked to the GPI in nascent GPI-APs [step 12]. In the *hld1* mutant, this step does  
641 not occur. As a consequence, the GPI-APs retain their inositol-linked acyl chain (indicated in  
642 pink), resulting in a “3-footed” configuration that retains the GPI-AP in the plasma membrane.  
643 We show that knockout of HLD1 completely prevents SI. This demonstrates that GPI-AP  
644 remodeling by inositol deacylation is critical for the SI response. As release of GPI-APs from  
645 the plasma membrane by phospholipase C activity (PLC) is implicated, it is tempting to  
646 speculate that release of GPI-APs into the apoplast is critical for SI. Based on these  
647 observations, we propose that SI depends on direct or indirect interaction of released apoplastic  
648 GPI-APs. *Cartoon adapted from*<sup>9</sup>.

## Supplementary Information for

### **GPI anchor remodeling by the plant PGAP1 ortholog HLD1 is required for *Papaver* self-incompatibility**

Zongcheng Lin, Fei Xie, Marina Triviño, Tao Zhao, Frederik Coppens, Lieven Sterck, Maurice Bosch, Veronica E. Franklin-Tong, and Moritz K. Nowack

Correspondence to: [zongcheng.lin@psb.vib-ugent.be](mailto:zongcheng.lin@psb.vib-ugent.be); [mub@aber.ac.uk](mailto:mub@aber.ac.uk); [v.e.franklin-tong@bham.ac.uk](mailto:v.e.franklin-tong@bham.ac.uk); [moritz.nowack@vib.be](mailto:moritz.nowack@vib.be).

#### **This PDF file includes:**

Materials and Methods

Figs. S1 to S14

Tables S1 to S5

References (44-55)

## Materials and Methods

### Plant materials and growth conditions

Plants were grown as described in (22). Briefly, chlorine gas sterilized seeds were sown out on LRC2 plates (2.15g.L<sup>-1</sup> MS basal salts Duchefa Biochemie, 0.1g.L<sup>-1</sup> MES, pH adjusted to 5.7 with KOH, 1.0% Plant Tissue Culture Agar NEOGEN), and stored in cold room (4 °C) for three days before being moved to a growth chamber for vertical growth with continuous light emitted by white fluorescent lamps (intensity 120 μmol.m<sup>2</sup>.s<sup>-1</sup>), at 22 °C. Seedlings were transferred to Jiffy pots in soil and grown under glasshouse conditions under a 16h light/8h dark regime at 22 °C. Seeds were collected when the plants were completely dry and kept at room temperature (RT) or 4 °C for long-term storage.

### EMS mutagenesis and mutants screen

T2 seeds of *At-SI* lines were collected and sown out on LRC2 plates containing BASTA (10 μg.ml<sup>-1</sup>). Single insertion transgenic *At-SI* lines were obtained by selecting lines showing ~75% of BASTA resistance. Homozygous lines were obtained by selecting lines whose T3 seeds showed 100% BASTA resistance. As only ~50 seeds could be harvested from an *At-SI* plant, selected *At-SI* lines were propagated for two more generations to collect enough seeds for EMS mutagenesis. EMS mutagenesis was carried out as described in (44). M1 *At-SI* seeds after EMS mutagenesis were sown in Jiffy pots (~3 seeds/pot) and allowed to germinate and grow in a greenhouse. The first screen was carried out ~10 days after flowering. Mutants showing longer siliques were selected. For those M1 plants which did not show a desired phenotype, the primary inflorescences were cut back and a second screen was carried out ~2 weeks later. In total, ~50,000 M1 plants were screened, from which 40 mutants were identified. After eliminating those mutants with transgene mutations, altered PrpS<sub>1</sub>-GFP expression levels, or pseudo-fertilizations, 12 mutants were left. These mutants were named *highlanders* (*hlds*).

To eliminate the effect of the mosaic nature of the M1 genetic background, M1 *hld* mutants (male) were backcrossed with the parent *At-SI* line (female) to obtain the backcross1 (BC1) generation of *hld* mutants. To reduce the number of background single-nucleotide polymorphisms (SNPs) caused by EMS mutagenesis, BC1 *hld* mutants were backcrossed again with the parent *At-SI* line to obtain the BC2 generation (Fig S1).

### WGS, backcrosses and SNP analysis to identify the causal gene for the *hld1* mutants

For each of the *hld* mutant lines (*hld1-3/5/7/19/24/25*), leaf disc samples from 50 self-compatible BC2 plants were pooled together, followed by DNA extraction using a CTAB-based protocol (45), and whole genome re-sequencing (WGS) using Illumina next generation sequencing (NGS) platform. The *At-SI* line was also sequenced as the background control. SNPs were identified using SHOREmap (21). As the *hlds* were gametophytic mutations, after backcrossing with the unmutagenised parent, any unlinked SNP generated by the EMS mutagenesis segregated 1:3 in the pool of mutant individuals of the F1 population of the second backcross (BC2), whereas the causative SNP segregated 1:1 (46). Thus, calculating the SNP ratio in the BC2 population allowed us to identify the causal mutation region.

### Cloning, transgenic and T-DNA lines

All the expression vectors were generated using either Greengate cloning (47), or Gibson assembly (New England BioLabs). High-fidelity Phusion DNA polymerase (New England

BioLabs) was used for all the DNA fragment amplification. All the clones were verified through Sanger sequencing.

The expression clone pFASTGreen-pHLD1::mCherry-cHLD1 and pFASTGreen-pHLD1::mCherry-cHLD1(S218A) was generated using Greengate cloning, during which entry clones pGG-A-pHLD1-B, pGG-B-mCherry-C, pGG-C-cHLD1-D or pGG-cHLD1(S218A)-D, pGG-D-linker-E, pGG-E-G7T-F, and pGG-F-linker-G were cloned into Greengate destination vectors pFAST-GK-AG (23). The Greengate entry clone pGG-B-mCherry-C, pGG-D-linker-E, pGG-E-G7T-F, and pGG-F-linker-G were obtained from PSB Plasmid Vector Collection (<https://gatewayvectors.vib.be/collection>). The Greengate entry clone pGG-A-pHLD1-B was obtained through Gibson assembly. The 2755 bps upstream of At3g27325.2 translational start site was amplified as the HLD1 promoter (pHLD1) sequence. As there is a BsaI restriction site within the pHLD1 sequence, two pHLD1 fragments were separately amplified using primer sets 665/666 and 667/668, respectively, with Col-0 Arabidopsis gDNA as the template to mutate the BsaI site, and assembled into BsaI linearized pGGA000 entry vector backbone using Gibson assembly. To make the Greengate entry clone pGG-C-cHLD1-D, HLD1 cDNA (cHLD1) was amplified and cloned into pJET1.2 using CloneJET PCR Cloning Kit (ThermoFisher). There are three different HLD1 splice variants according to TAIR (<https://www.arabidopsis.org>) annotation. The coding region of HLD1.1 was amplified in this experiment. As there are 3 BsaI restriction sites within the coding region of cHLD1.1, cHLD1.1 was amplified through a two-step protocol. Four cHLD1.1 fragments were amplified using primer sets 732/675, 676/677, 678/679, and 680/683 with Arabidopsis seedling cDNA as the template. Mutations in these primers were designed so that the encoded protein was not changed. These four DNA fragments were assembled into cHLD1.1 using overlap PCR. The resulting PCR products were cloned into pJET plasmid vector backbone to obtain the Greengate entry clone pGG-C-cHLD1-D. To make the Greengate entry clone pGG-C-cHLD1(S218A)-D, two cHLD1(S218A) fragments were amplified using primer sets 732/834, 833/683 with pGG-C-cHLD1-D as the template. Mutations in the primers were designed so that the Serine 218 was changed to Alanine. These two PCR fragments were assembled into cHLD1(S218A) using overlap PCR, after which the resulting PCR products were cloned into pJET plasmid vector backbone to obtain the Greengate entry clone pGG-C-cHLD1(S218A)-D. Detailed primer information can be found in Supplemental Table S5. The expression vectors were transformed into GV3101 *Agrobacterium tumefaciens* competent cells. The floral-dipping method was adopted to stably transform homozygous *At-SI/hld1-7* Arabidopsis plants to obtain *At-SI/hld1/cHLD1* and *At-SI/hld1/cHLD1(S218A)* lines.

To generate new HLD1 mutant alleles, 4 gRNAs (Table S5) were designed using CRISPOR (48) and cloned into BbsI linearized Greengate entry vectors pGG-A-AtU6-26-B, pGG-B-AtU6-26-C, pGG-C-AtU6-26-D, and pGG-D-AtU6-26-E respectively via Gibson assembly. The resulting Greengate entry modules were assembled into pFASTGK-pUbi-Cas9-AG together with pGG-E-linker-G to generate expression vector pFASTGK-CRISPR-HLD1, which was transformed into *At-PrpS1* background line via *Agrobacterium*-mediated floral-dipping. *Hld1-c1* and *hld1-c2* alleles were screened from T2 Cas9-free seedlings and used for further experiments.

Seeds of T-DNA lines, *seth1-2* (SAIL\_674\_B03) and *seth2* (SALK\_039599) were obtained from The Nottingham Arabidopsis Stock Center (NASC). Primers used for genotyping these two T-DNA mutants can be found in Table S5. Genotyping of plants were carried out using Phire Plant Direct PCR Kit (Thermo Scientific) according to the manufacturing instructions.

Triton X-114 assay, and PI-PLC assay

Three-day-old seedlings were collected into a 2 mL tube with 3 steel beads (3 mm) and frozen in liquid N<sub>2</sub>. Frozen samples were homogenized using a grinding mill (Retsch MM 400) at 20 Hz for 3 x 40 s. Samples were put back to liquid N<sub>2</sub> after each grinding. For Triton X-114 assays, 2% Triton X-114 extraction buffer [100mM Tris-HCl pH=7.5, 150mM NaCl, 2mM EDTA, 10% glycerol, 2% Triton X-114 (Sigma-Aldrich), 1x cOmplete protease inhibitor (Roche)] was added to the homogenized samples. Triton X-114 was pre-processed as described in (49) before being added to extraction buffer. Samples were centrifuged at 21,000g at 4 °C, and the supernatant was kept for further experiments. Protein concentrations were determined using Bradford (Bio-Rad) assay by diluting the supernatant 10 times. To separate the detergent and aqueous phase, samples were incubated at 37 °C for 10 mins followed by centrifugation at 21,000g for 10 mins (50). The aqueous upper phase was carefully moved into a new tube. Proteins of both the detergent and aqueous phase were precipitated using MeOH/CHCl<sub>3</sub> (51) and dissolved in 1x loading buffer.

PI-PLC assays were modified from protocols published by (52, 53). In brief, membrane protein extraction buffer [100 mM Tris-HCl pH 7.5, 25% (w/w) sucrose, 5% (v/v) glycerol, 5 mM EDTA, 5 mM KCl, 2x cOmplete protease inhibitor (Roche)] was added to the homogenized samples. Samples were centrifuged at 600g for 3 mins and the supernatants were kept as whole protein extracts. To obtain the membrane fraction, supernatants were diluted with equal volume of water and centrifuged at 21,000g for 2 hours at 4 °C. The resulting pellets were suspended in PI-PLC treatment solution [10 mM Tris-HCl pH 7.5, 5% (v/v) glycerol]. PI-PLC (ThermoFisher) was added to a final concentration of 2 units.mL<sup>-1</sup>. For mock control, 50% glycerol was added. Samples were incubated at 37 °C for 1.5 h, followed by centrifugation at 21,000g for 2 hours at 4 °C. The supernatant upper phase was carefully moved into a new tube, and precipitated using MeOH/CHCl<sub>3</sub> (51). The pellet was dissolved in 1x loading buffer directly.

SDS-PAGE and Western blot were carried out as described in (19) with minor modifications. Proteins were separated by 4-20% Mini-PROTEAN TGX Stain-Free Precast gels (Bio-Rad). Stain-free signals are indicated as “loading” in the figures. The primary antibodies anti-GFP (Takara), and anti-Aquaporins (Agrisera) were used at 1:1000 dilution, and anti- $\alpha$ -Tubulin (Sigma-Aldrich) were used at 1:4000 dilution. The secondary HRP-conjugated anti-Mouse (GEHEALTH) and anti-Rabbit (GEHEALTH) antibodies were both used at a dilution of 1:5000. The Western blot signals were detected using WesternBright ECL HRP substrate (ADVANSTA).

#### Seedlings treated with PrsS proteins

PrsS protein treatment was performed as described in (22). Briefly, PrsS proteins were dialysed in 1/5 LRC2 liquid medium overnight in 4 °C before use. The concentration of PrsS proteins was determined using Bradford assay (BioRad). To examine the effect of PrsS proteins on seedling growth, 10  $\mu$ l PrsS proteins (10 ng. $\mu$ l<sup>-1</sup>) were added to the root tip of 4-day-old seedling on LRC2 plates. The plates were kept horizontally for 30 min to allow the PrsS proteins to dry before being placed back to the growth chamber vertically.

#### Arabidopsis pollen SI bioassay *in-vitro*

Arabidopsis pollen was transferred onto the surface of an 8-well Chambered Coverglass (Thermo Scientific Nunc Lab-Tek) by using tweezers to hold a stage 13-14 flower inverted of the coverglass and brushing the flower over the coverglass gently. Without hydrating the pollen, *A. thaliana* pollen germination medium [AtGM; 15% (w/v) sucrose, 0.01% (w/v) H<sub>3</sub>BO<sub>3</sub>, 5 mM KCl, 1 mM MgSO<sub>4</sub>, 2.5 mM CaCl<sub>2</sub>, 2.5 mM Ca(NO<sub>3</sub>)<sub>2</sub>, and 10% PEG3350, pH=7.0 adjusted using KOH; modified from (54) containing 10 ng. $\mu$ l<sup>-1</sup> PrsS proteins (SI treatment) or not (Mock control)]



was added. For each sample, 200  $\mu\text{l}$  medium was used. Samples were incubated at RT for 6h before FDA/PI co-staining and fluorescent microscopy examination. FDA (2  $\mu\text{g}\cdot\text{ml}^{-1}$ ) and PI (5  $\mu\text{g}\cdot\text{ml}^{-1}$ ) were added to the sample right before microscopy examination, during which the number of FDA positive (alive) and PI positive (dead) pollen were counted. For each sample, 100 - 200 pollen were counted. When the PLC inhibitors (U73122, ET-18-OCH<sub>3</sub>, C48/80) were needed, the pollen were pretreated with the PLC inhibitors for 1h before the SI was induced. U73122 (Sigma-Aldrich) was dissolved in chloroform. ET-18-OCH<sub>3</sub> (Sigma-Aldrich) was dissolved in DMSO, and C48/80 (Sigma-Aldrich) was dissolved in water. For mock treatment, equal amount of solvent was used.

#### PGAP1 Phylogeny analysis

PGAP1 domain containing proteins were downloaded from Pfam (<http://pfam.xfam.org/family/PGAP1>). In total, 631 proteins from species across three eukaryotic kingdoms were downloaded (Table S6). Multiple sequence alignment was performed using MAFFT (version 7.187). IQ-TREE (version 1.7-beta7) was used for the maximum-likelihood tree inference with 1000 bootstrap replicates (under the model of 'JTT+R', -alrt 1000 -bb 1000).

#### Imaging, image analysis and figure preparation

Imaging of the PI stained root was performed using a Zeiss LSM710 microscope using a PlanApochromat 20x objective (numerical aperture 0.8). Seedling samples were mounted with 1/5 LRC2 medium containing 5  $\mu\text{g}\cdot\text{ml}^{-1}$  PI. PI was excited with 561 nm and fluorescence emission between 580 nm and 700 nm were collected.

For the *in-vitro* pollen SI bioassay, pollen was co-stained using FDA (2  $\mu\text{g}\cdot\text{ml}^{-1}$ ) and PI (5  $\mu\text{g}\cdot\text{ml}^{-1}$ ) and visualized using a Leica SP8 confocal laser scanning system with Fluostar VISIR 25x/0.95 water objective and HyD detector. FDA was excited with 488 nm and fluorescence emissions between 500 nm and 550 nm were collected. PI was excited with 561 nm and fluorescence emission between 580 nm and 700 nm were collected.

GFP-SKU5 were visualized using a Leica SP8 confocal laser scanning system with HCPL APO CS2 40x/1.10 (water) objective and HyD detector. Samples were excited with 488 nm, and fluorescence emissions between 500 nm and 550 nm were collected.

All the images were processed and analyzed using Fiji (<https://fiji.sc/>) (55).

#### Statistical analysis

Statistical analysis was performed using GraphPad Prism 8.0 for Windows ([www.graphpad.com](http://www.graphpad.com)).

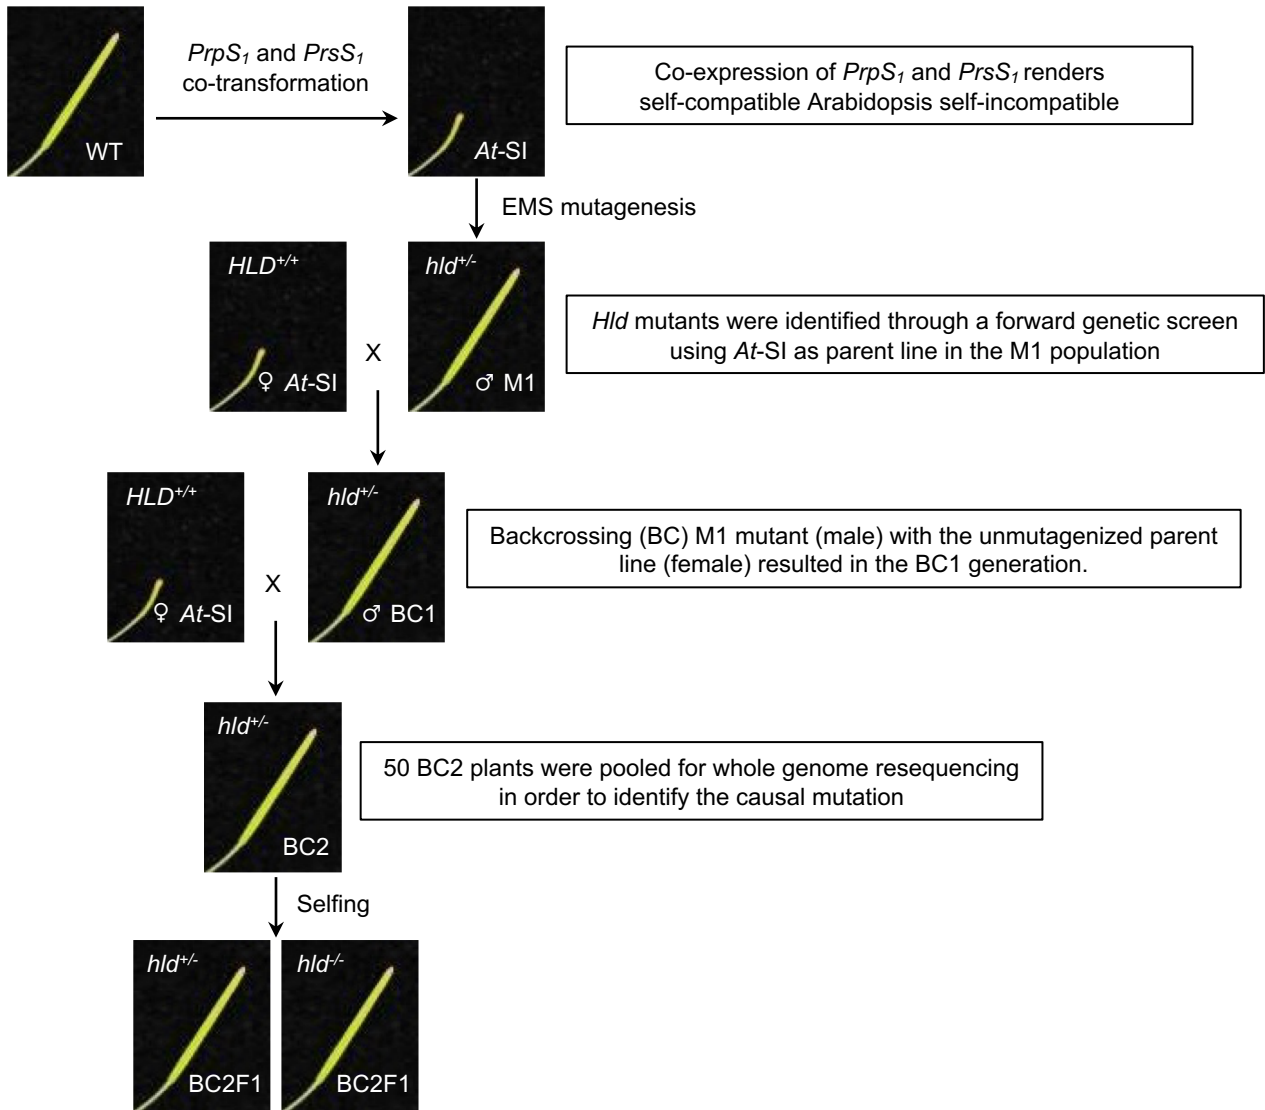

### Supplemental Figure S1. Experimental scheme.

Co-expression of *PrpS<sub>1</sub>* and *PrsS<sub>1</sub>* in the Col-0 background renders self-compatible Arabidopsis self-incompatible. The resulting SI Arabidopsis was used as the parent line in an EMS-based forward genetic screen looking for SC mutants. The mutants were named *highlanders* (*hlds*). *Hld* mutants identified in the M1 population were back-crossed with parent *At-SI* line to obtain the backcross 1 (BC1) generation. To reduce the number of background non-causal SNPs, BC1 plants were back-crossed again with the parent *At-SI* line to obtain the BC2 generation. Fifty BC2 plants were pooled for WGS to identify the causal mutation. Seeds collected from BC2 selfing (BC2F1) were used for the identification of homozygous *hld* mutants.

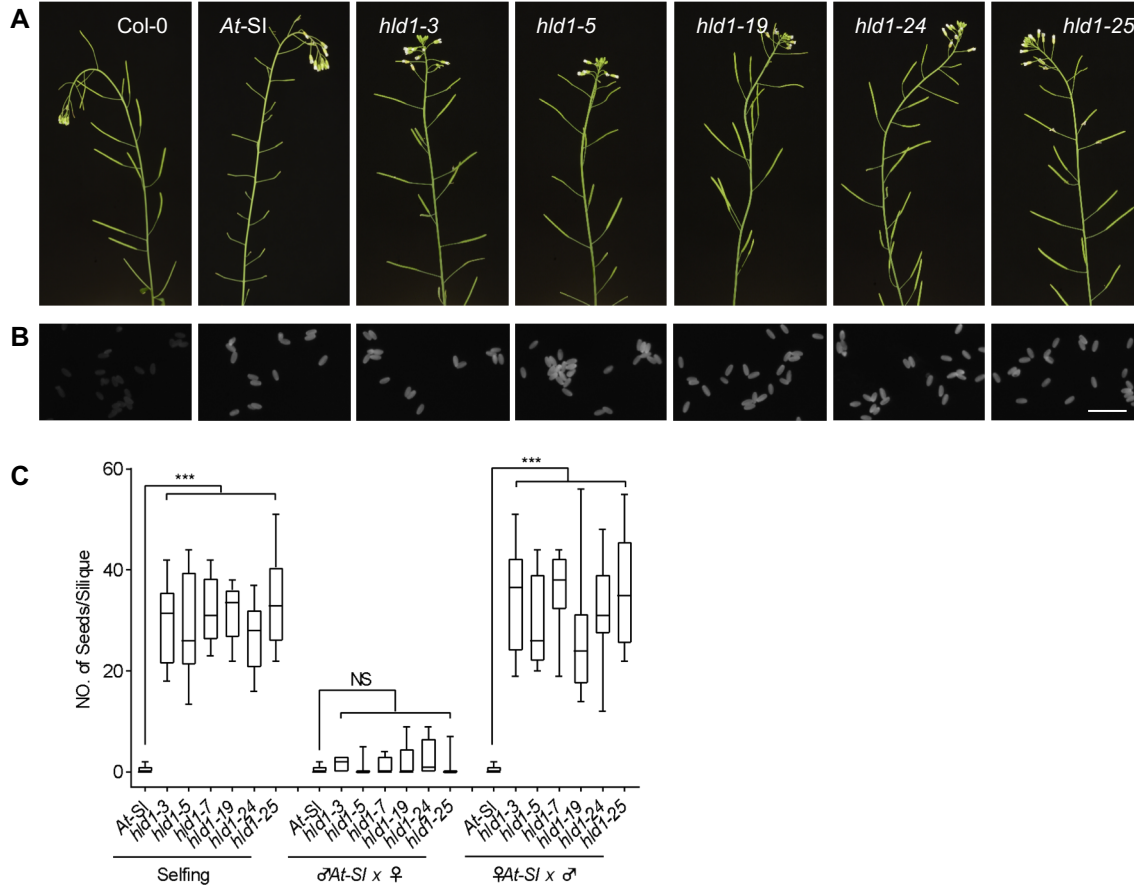

**Supplemental Figure S2. *hld1* mutants are defective in SI.**

(A) ***hld1* was identified from an EMS mutagenesis screen.** Mutants were screened for a defective SI phenotype, with normal seed set. Representative images of mature inflorescences from Col-0, *At-SI*, and *hld1-3/5/19/24/25* mutant plants show that all these heterozygous mutants displayed no other obvious developmental phenotype in comparison with Col-0.

(B) **There was no alteration of PrpS<sub>1</sub>-GFP signals in *hld1* mutants.** *At-SI* pollen grains showed homozygous PrpS<sub>1</sub>-GFP signal while only background fluorescence was observed in Col-0. No gross alteration in the PrpS<sub>1</sub>-GFP signals was observed in any of the *hld1* mutants compared to the parental *At-SI* line. Bar = 100  $\mu$ m.

(C) ***hld1* mutants have pollen defects.** *hld1* stigmas were pollinated with self-pollen (selfing) or *At-SI* pollen ( $\delta$  *At-SI* x ♀) and *At-SI* stigmas pollinated with *hld1* pollen (♀ *At-SI* x ♂). Silique length measurements (Fig 1B) and number of seeds per silique (C) showed that the *hld1* mutants used as the male parent had significantly longer silique lengths and higher seed-set than the *At-SI* parent line. *hld1* mutants used as the female parent pollinated with *At-SI* pollen displayed a normal SI phenotype of short silique lengths and low seed set. N=9-11. One-way ANOVA. \*\*\*: p<0.001. NS: not-significant, p>0.05.

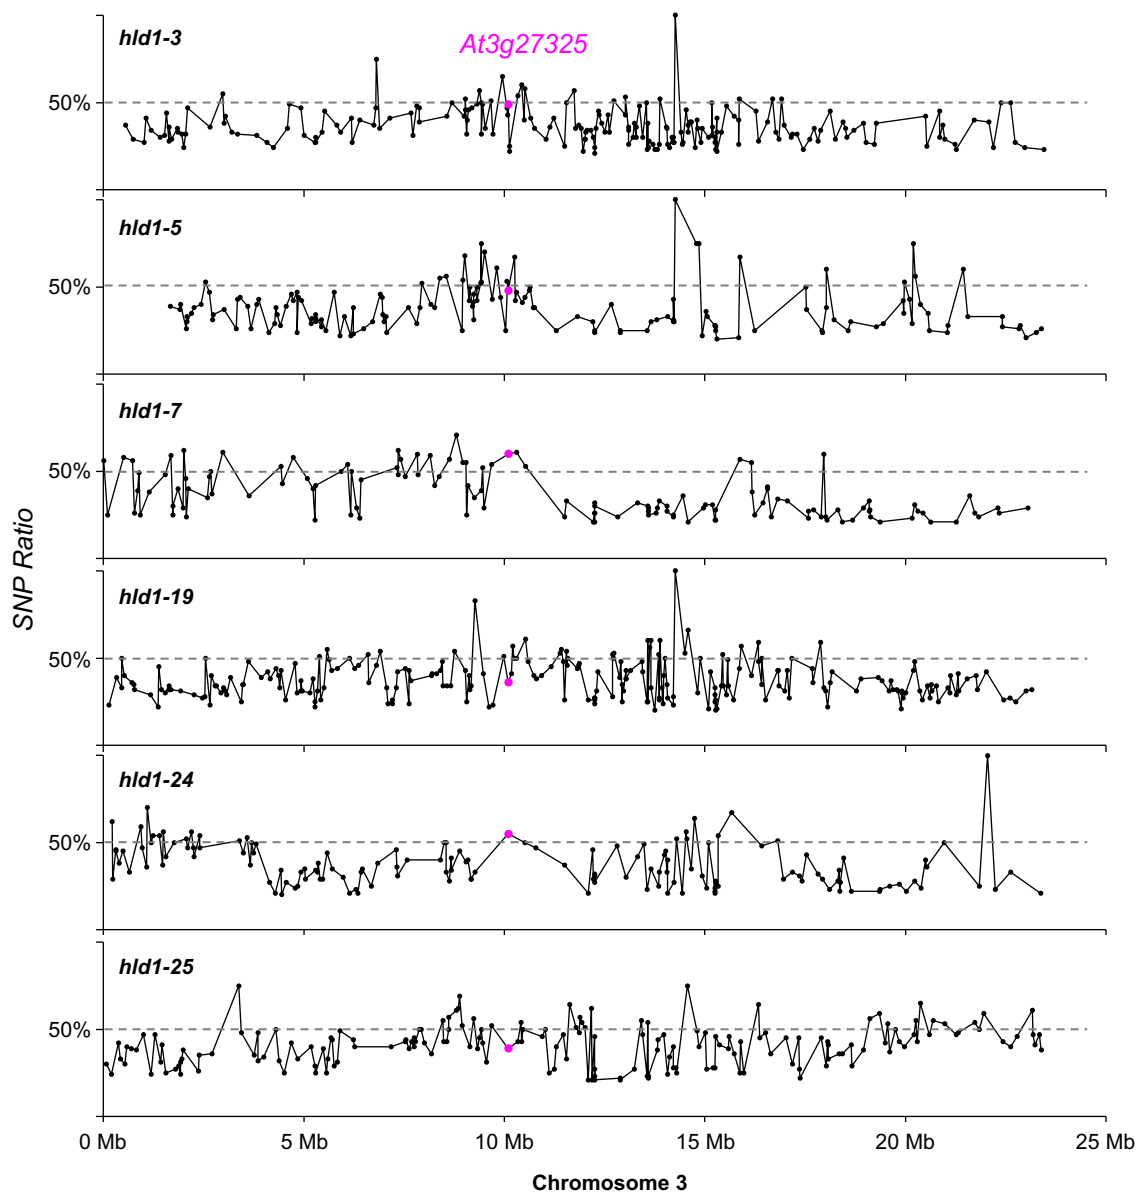

**Supplemental Figure S3. WGS identified *At3g27325* as the causal gene candidate of the *hld1* mutants.**

As the *hlds* were gametophytic mutations, after backcrossing with the unmutagenised parent, any unlinked SNP generated by the EMS mutagenesis segregated 1:3 in the pool of mutant individuals of the F1 population of the second backcross (BC2), whereas the causative SNP segregated 1:1. Thus, calculating the SNP ratio in the self-compatible BC2 population allowed us to identify the causal mutation region. Analysis of the SNPs in the 6 *hld1* mutants uncovered six different nonsynonymous mutations of an uncharacterized gene, *At3g27325*, in all the 6 different *hld1* mutants. This suggests that *At3g27325* is the causal gene responsible for the SC phenotype in all the 6 *hld1* mutants.

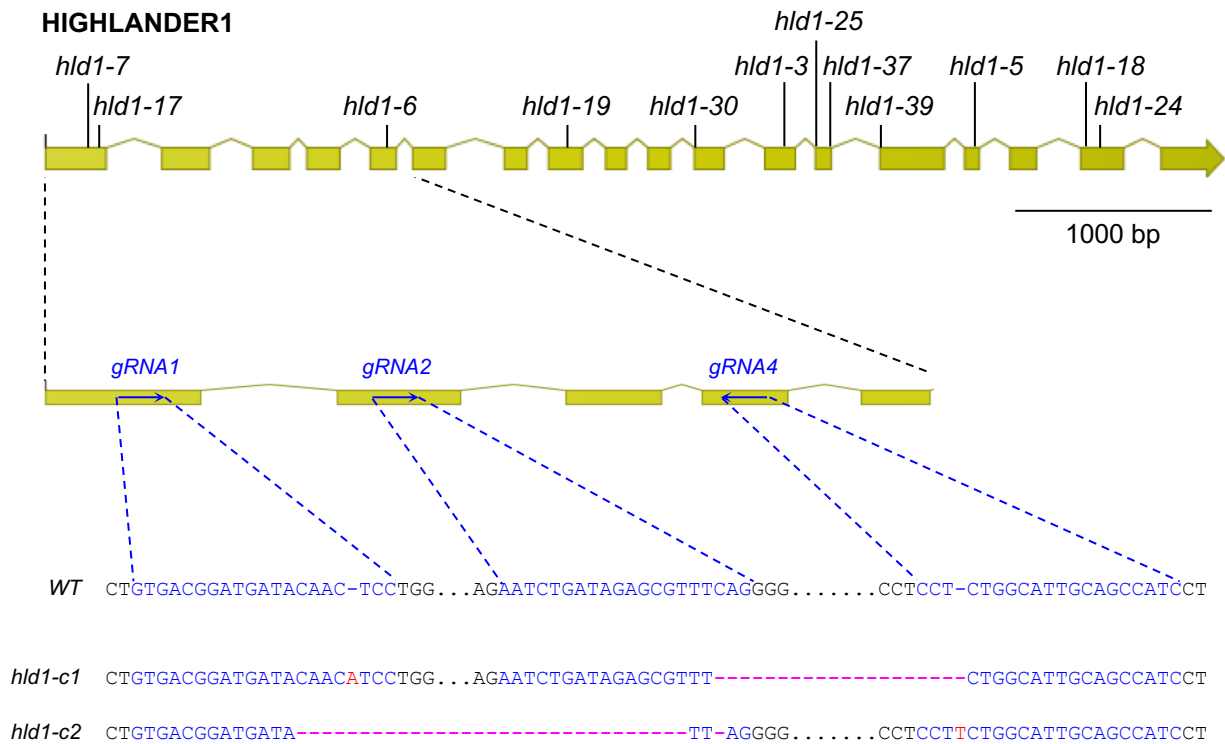

**Supplemental Figure S4. Two new *At3g27325* mutant alleles were generated using CRISPR/Cas9.**

*Hld1-3/5/6/7/17/18/19/24/25/30/37/39* (upper row) were identified from the EMS screen; *hld1-c1* and *hld1-c2* (bottom rows) are the CRISPR/Cas9 generated mutants. The detailed positional information of each mutant can be found in **Figure 1C** and **Supplemental Table S3**. Yellow boxes indicate the exons of *At3g27325.1*, blue text indicates gRNAs, red nucleotides indicate insertions, pink dashes indicate deletions.

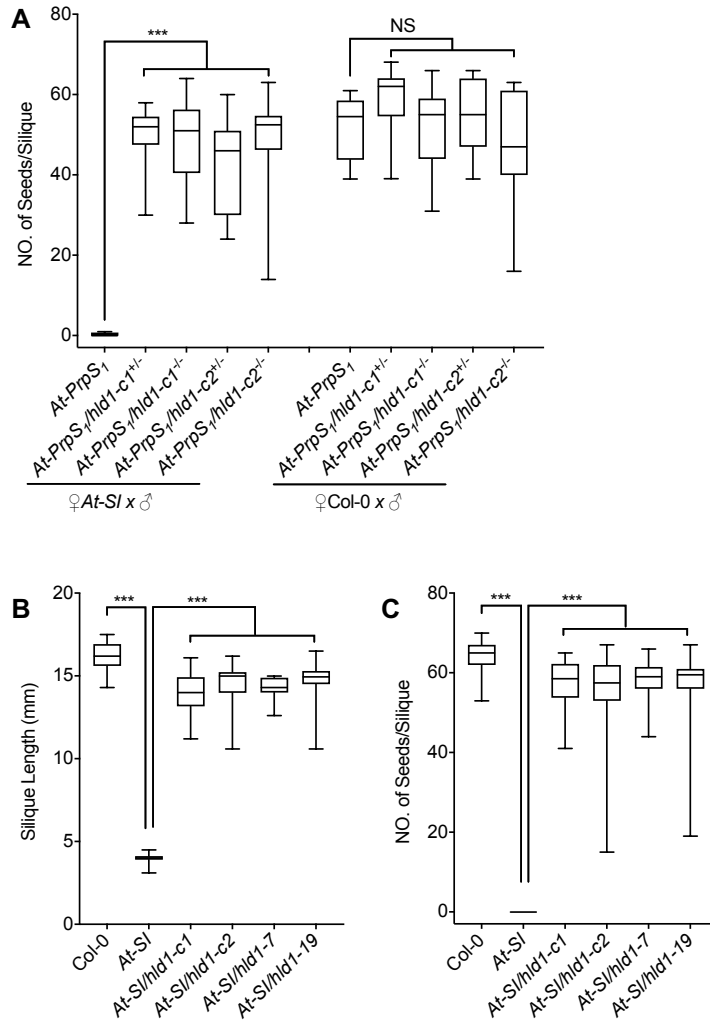

**Supplementary Figure S5. Evidence that *At3g27325* is the causal gene of the *hld1* mutants.**

(A-C) **Mutation of *At3g27325* phenocopies *hld1*.** (A) *At-PrpS<sub>1</sub>* pollen containing the CRISPR/Cas9-derived *At3g27325* mutant allele (*hld1-c1* or *hld1-c2*) were pollinated onto *At-SI* or *Col-0* stigmas. Significant increases in the silique lengths (**Figure 1D**) and number of seeds per silique (A) were observed when *At3g27325* was mutated, in both heterozygous and homozygous mutants. N=12-16. One-way ANOVA with multiple comparisons. \*\*\*:  $p < 0.001$ . NS:  $p > 0.1772$ . (B-C) Introduction of the *hld1-c1* or *hld1-c2* mutant allele into the *At-SI* background resulted in SC mutants showing silique lengths (B) and seed-set levels (C) similar to the EMS mutagenesis generated *hld1* mutants. N = 30 siliques from 3 independent plants, 10 each. One-way ANOVA with multiple comparisons. \*\*\*:  $p < 0.001$ .

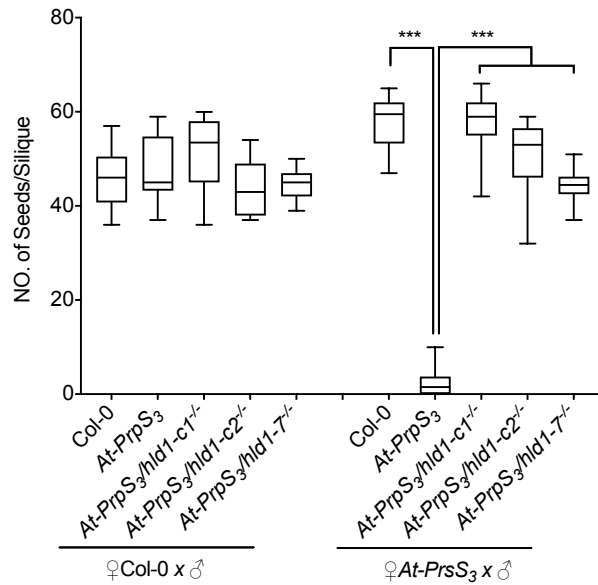

**Supplementary Figure S6. *HLD1* regulates SI in an S-specific manner.**

*At-PrpS<sub>3</sub>* pollen containing the *hld1* mutant allele (*hld1-c1*, *hld1-c2*, or *hld1-7*) were pollinated onto *At-PrsS<sub>3</sub>* or *Col-0* stigmas. Silique lengths (**Figure 2A**) and seed set were measured. Consistent with previous observations, when *Col-0* stigmas were pollinated with *Col-0*, or *At-PrpS<sub>3</sub>*, or *At-PrpS<sub>3</sub>/hld1* pollen, there was no significant difference observed in the silique length and number of seeds per silique (20). Pollinating *At-PrsS<sub>3</sub>* stigmas with *At-PrpS<sub>3</sub>* pollen resulted in SI, with a significant reduction in silique length and almost no seed, compared with the control pollination ♀ *At-PrsS<sub>3</sub>* x ♂ *Col-0*. In contrast, pollinating *At-PrsS<sub>3</sub>* stigmas with *At-PrpS<sub>3</sub>/hld1* pollen resulted in silique length and seed-set like the controls, demonstrating that mutation of the *HLD1* gene abolishes the *PrpS<sub>3</sub>-PrsS<sub>3</sub>*-based SI. This provides good evidence that *HLD1* acts as a SI regulator in an S-specific manner.

N=10-20. One-way ANOVA. \*\*\*: p<0.001.

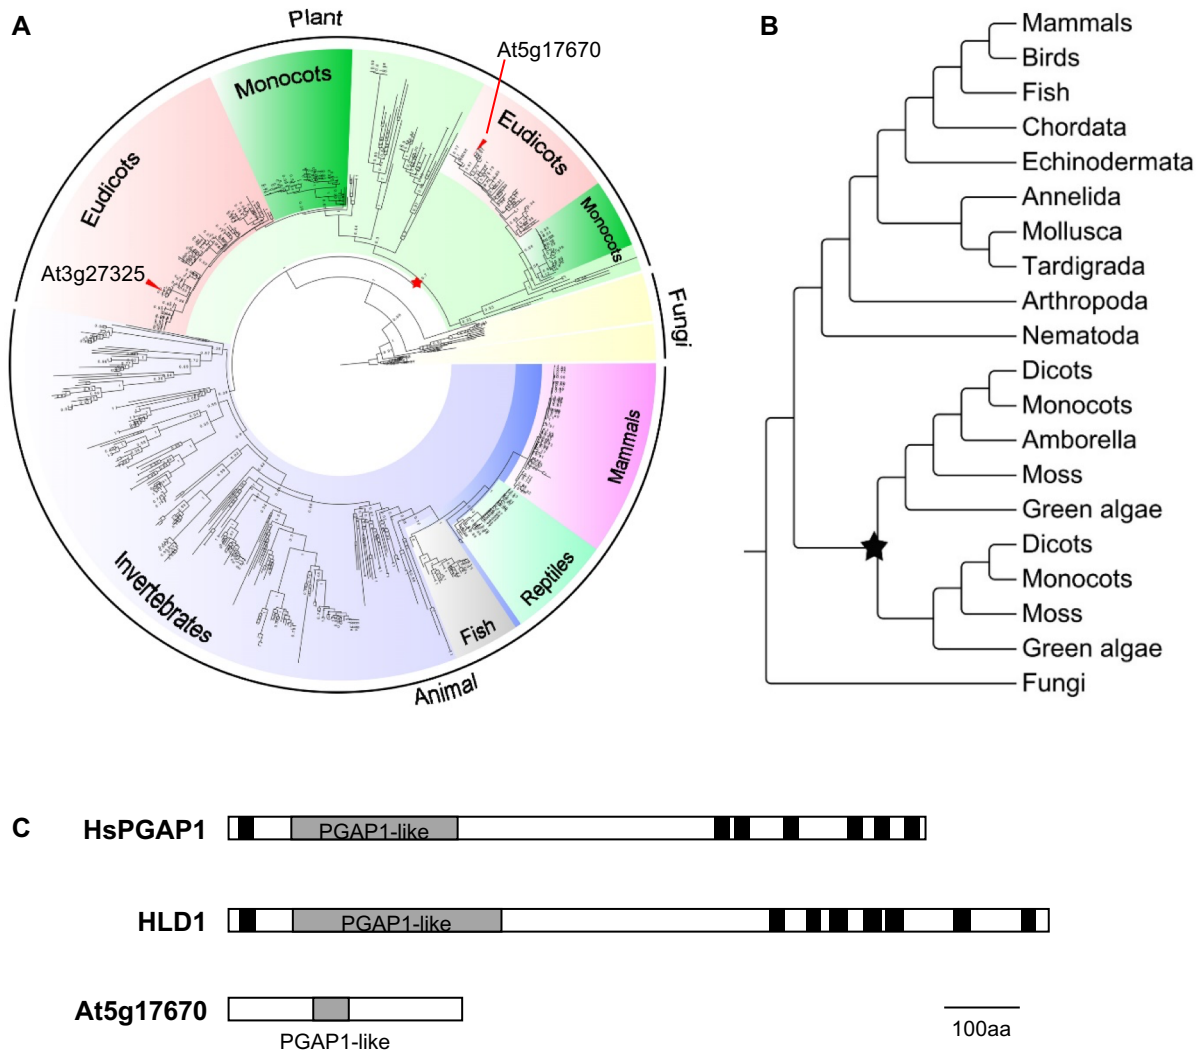

**Supplemental Figure S7. HLD1 is a HsPGAP1 orthologue.**

(A-B) **Phylogenetic analysis of the PGAP1-like domain-containing proteins across eukaryotic kingdoms.** We constructed a phylogenetic tree of 631 predicted PGAP1 protein homologues from > 300 eukaryotic species. Two major phylogenetic clades were identified for plants; in Arabidopsis, *HLD1* and another *PGAP1* homologue *At5g17670* were classified into different clades, indicated by red triangles. The divergence of these two clades can be traced back to an ancient whole genome duplication event occurring before the radiation of extant Viridiplantae, including green algae and the land plants. Stars indicate genome duplication events. Detailed information of the 631 PGAP1-like domain-containing proteins used in the construction of the phylogeny tree can be found in Supplemental Table S6.

(C) **Cartoon of the predicted secondary structure of HsPGAP1, HLD1 and At5g17670.** Comparison of the two homologs, *HLD1* and *At5g17670* from *A. thaliana* with *Homo sapiens* *PGAP1*, revealed that *HLD1* has a slightly higher amino acid sequence similarity to *HsPGAP1* (23.3%) than *At5g17670* (20.1%). Importantly, *HLD1* shares a similar secondary protein structure to *HsPGAP1* while *At5g17670* does not. Grey boxes represent the PGAP1-like domain. Black boxes represent predicted transmembrane domains. This suggests that *HLD1* is likely to be the *HsPGAP1* ortholog in Arabidopsis.



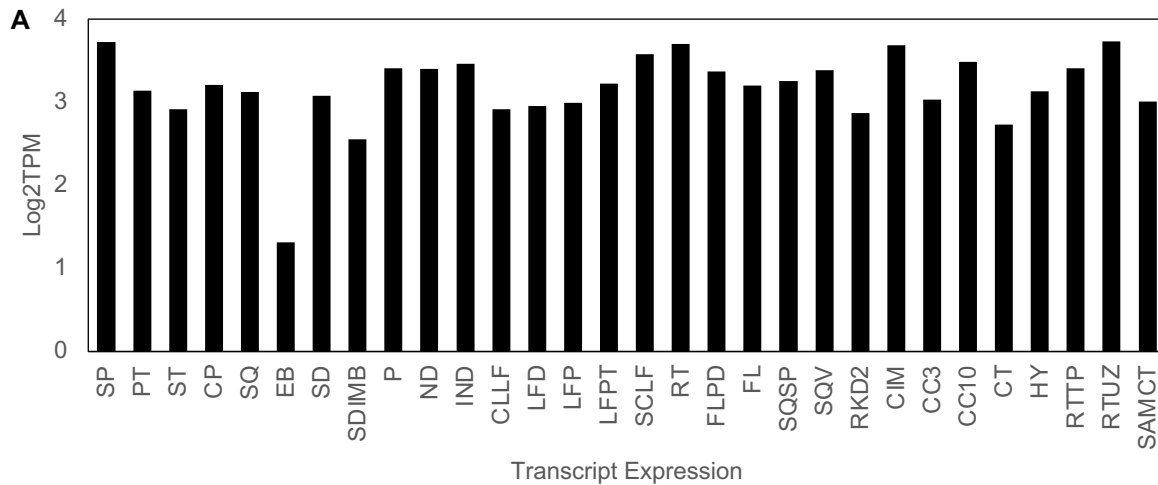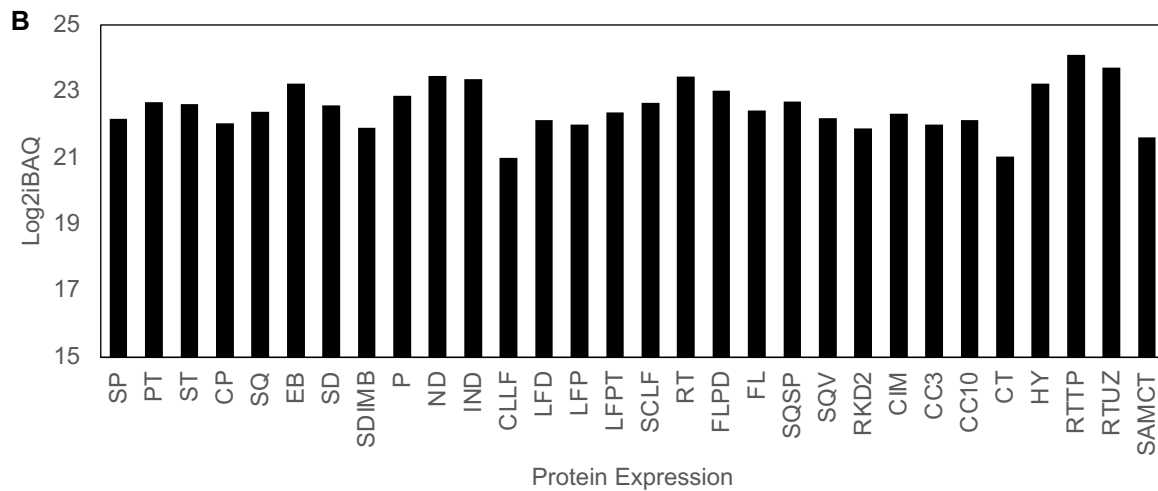

**Supplemental Figure S8. Transcript and protein expression patterns of HLD1 (*At3g27325*) in *Arabidopsis thaliana* tissues.**

The transcript (A) and protein (B) expression of the *HLD1* gene (*At3g27325*) across 30 different tissues was investigated using publicly available transcriptome and proteomics data (<http://athena.proteomics.wzw.tum.de/>). TPM: transcripts per million. iBAQ: intensity-based absolute quantification. Abbreviations: Sepal (SP); Petal (PT); Stamen (ST); Carpel (CP); Silique (SQ); Embryo (EB); Seed (SD); Seed imbibed (SDIMB); Pollen (P); Node (ND); Internode (IND); Cauline leaf (CLLF); Leaf distal (LFD); Leaf proximal (LFP); Leaf petiole (LFPT); Senescent leaf (SCLF); Root (RT); Flower pedicle (FLPD); Flower (FL); Silique septum (SQSP); Silique valves (SQV); Egg-cell like callus (RKD2); Callus (CIM); Cell culture early (CC3); Cell culture late (CC10); Cotyledons (CT); Hypocotyl (HY); Root tip (RTTP); Root upper zone (RTUZ); Shoot tip (SAMCT).

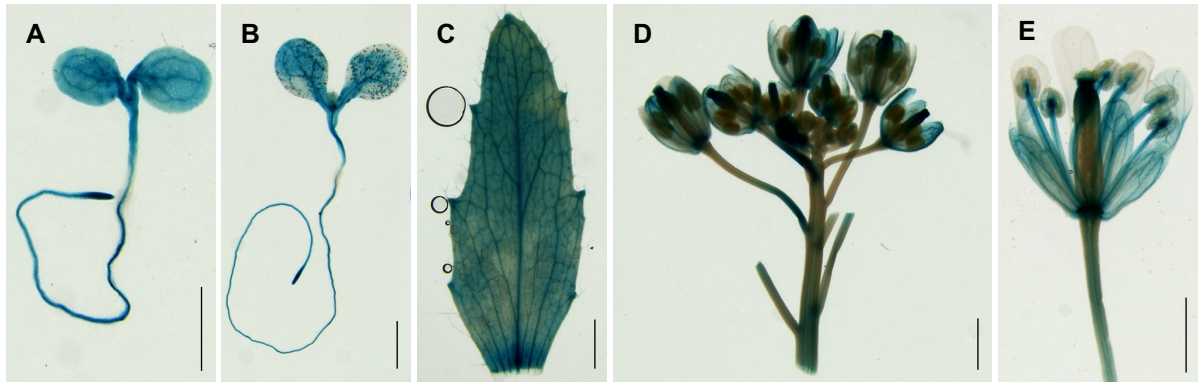

**Supplemental Figure S9. HLD1 is expressed in various plant tissues.**

The HLD1 expression pattern was examined using a pHLD1::GUS transgenic line. HLD1 was expressed in all the plant tissues examined. (A) 5-day-old seedling; (B) 8-day-old seedling; (C) mature leaf; (D) flower bud; (E) stage 13 flower. Representative images are shown from at least three independent lines. Bar = 1 cm.

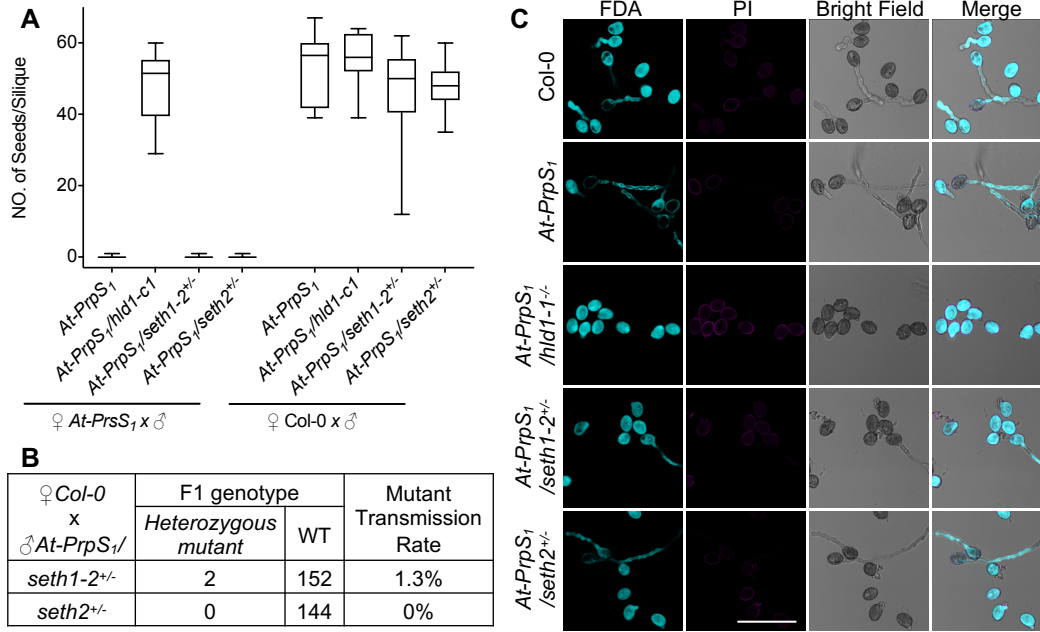

**Supplemental Figure S10. Evidence for involvement of the GPI-anchoring pathway in the regulation of SI-induced death of pollen**

(A-B) **Mutation of GPI-anchoring pathway genes does not phenocopy the *hld1* mutant phenotype.** GPI-anchoring pathway mutants, *seth1-2* and *seth2*, were introduced into *At-PrpS<sub>1</sub>* background, and the pollen were pollinated onto *At-PrsS<sub>1</sub>* or *Col-0* stigmas. Pollinating *At-PrsS<sub>1</sub>* stigmas with *At-PrpS<sub>1</sub>/seth1<sup>+/-</sup>* or *At-PrpS<sub>1</sub>/seth2<sup>+/-</sup>* pollen resulted in short siliques (Fig 4A) and no seedset (A). N=13-17. (B) Genotyping the F1 seedlings of ♀ *Col-0* x ♂ *At-PrpS<sub>1</sub>/seth1<sup>+/-</sup>* and ♀ *Col-0* x ♂ *At-PrpS<sub>1</sub>/seth2<sup>+/-</sup>* revealed that mutation of *seth1* or *seth2* abolished pollen fertilization completely.

(C) **Mutation of GPI anchor synthesis did not affect pollen viability.** The *seth1-2* and *seth2* mutations were introduced into *At-PrpS<sub>1</sub>* background, and the pollen was mock treated with *At-GM* (C) or *PrsS<sub>1</sub>* proteins (Fig 4B). The samples were co-stained with FDA and PI 6h after treatment. All the pollen samples showed >97% viability when treated with *At-GM* buffer. When treated with *PrsS<sub>1</sub>* proteins (Fig 4B), only minimal (~3%) pollen death was observed for *Col-0* or *At-PrpS<sub>1</sub>/hld1* pollen, which was comparable to that of *At-GM* buffer control. Bar = 100 μm. Three independent experiments were carried out. In each experiment, 100-200 pollen grains were counted for each of the samples.

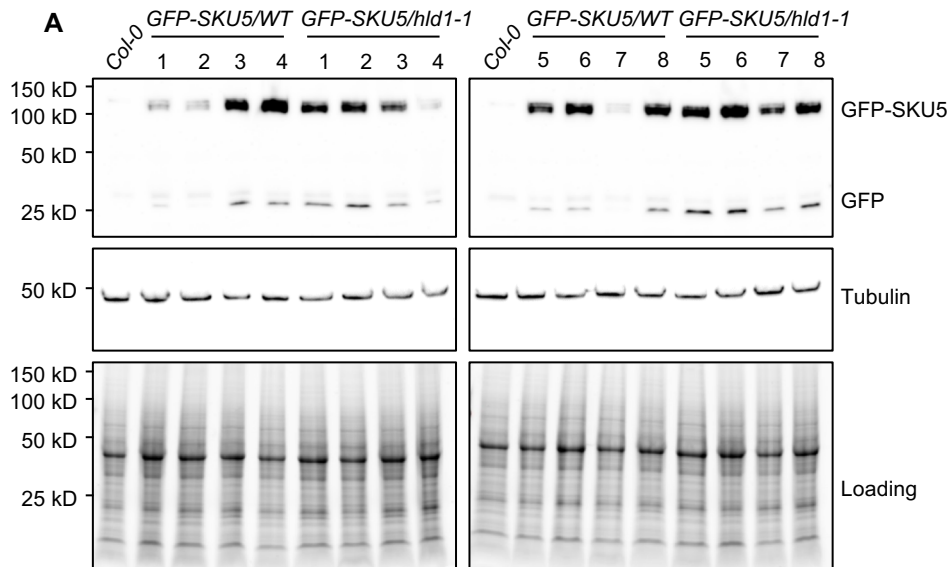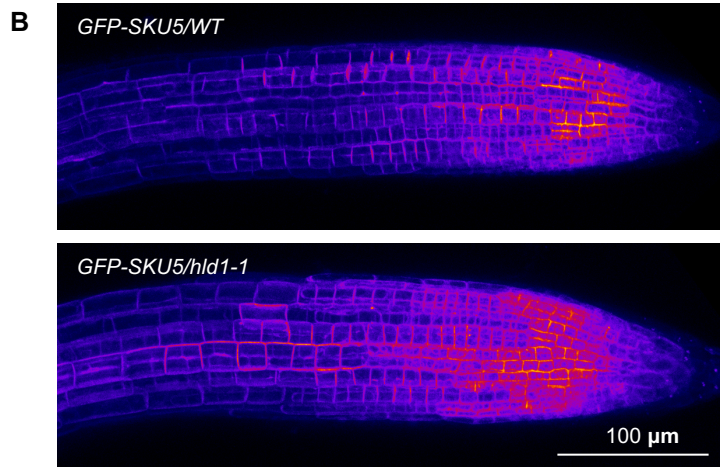

**Supplemental Figure S11. Mutation of HLD1 does not affect the GFP-SKU5 protein expression level and localization.**

(A) We examined the protein expression level of GFP-SKU5 using Western blot (A) in F3 seedlings derived from 16 F2 double homozygous siblings of the cross ♀*hld1-1* x ♂*GFP-SKU5*. Tubulin was employed as the internal control. Quantification of the Western blot signals (Figure 5A) revealed that the GFP-SKU5 protein expression level was not altered by the HLD1 mutation ( $p=0.7995$ ).

(B) Representative confocal images (maximum Z projections) of GFP-SKU5 signals of 4-day-old *GFP-SKU5/WT* or *GFP-SKU5/hld1-1* seedlings. Single Z slice in Fig 5B. Confocal examination showed that the HLD1 mutation had no obvious effect on the GFP-SKU5 signal distribution.

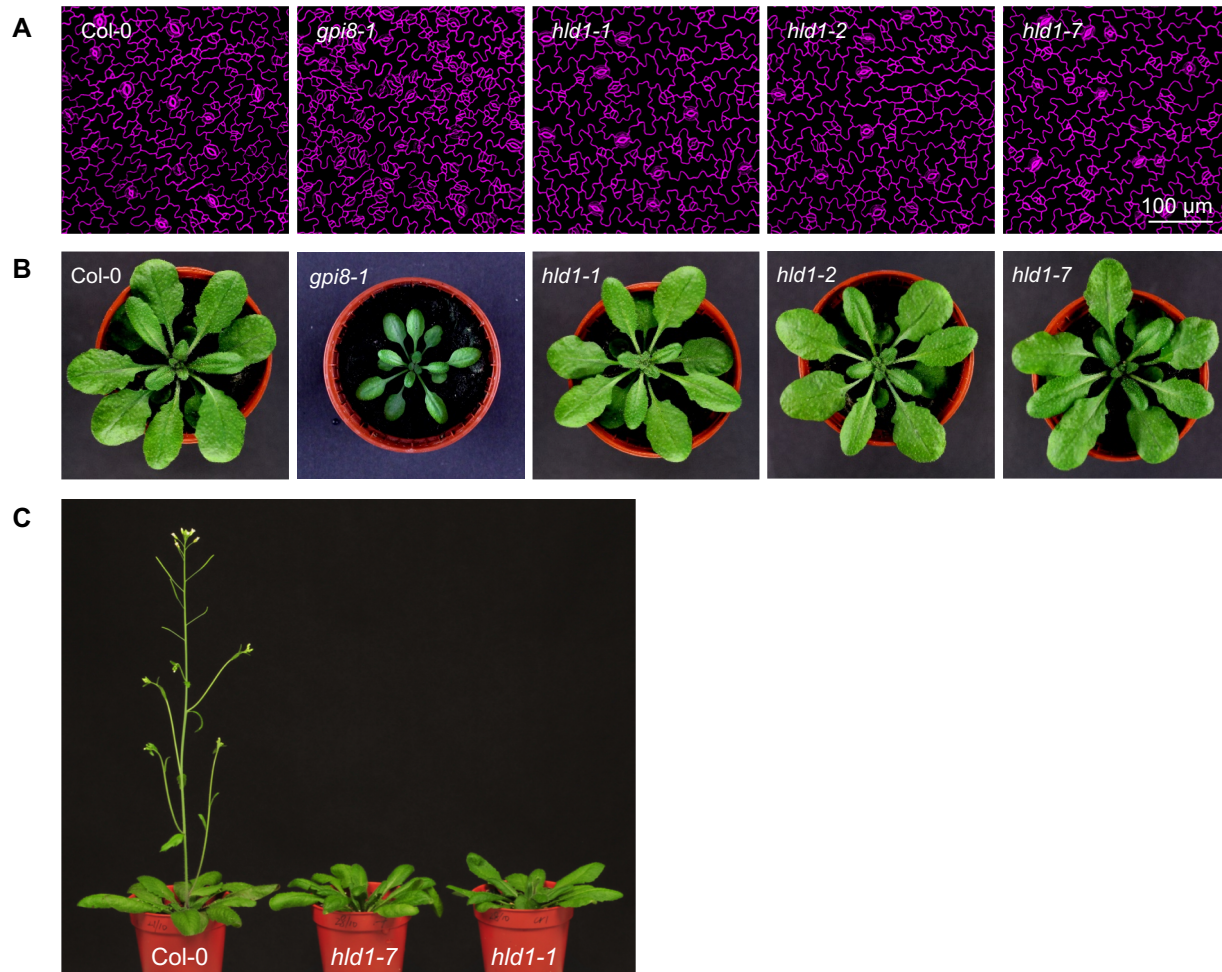

**Supplemental Figure S12. Mutation of HLD1 has no major obvious effect on plant development except for a delay in flowering time.**

(A-B) **Mutation of HLD1 has no major obvious effect on plant development.** The *gpi8-1* mutant was established to have reduced accumulation of GPI-APs; this affects both stomata formation, and plant growth (37). This *gpi8-1* was employed as a negative control here. (A) The *gpi8-1* mutation resulted in the formation of stomata clusters, while this was not observed in Col-0, nor the *hld1* mutants. (B) The *gpi8-1* mutation resulted in a significant delay of plant development, while this was not observed in Col-0, nor the *hld1* mutants.

(C) **Mutation of HLD1 resulted in a delay in flowering time of ~1 week.** Col-0 and homozygous *hld1* seeds were sown and grown under exactly the same conditions. Thirty-four-day-old Col-0 plants displayed extended inflorescences with flowers, while plants of the same age with the homozygous *hld1* mutation were just starting to flower. Flowering of *hld1* mutants was delayed for ~7 days. This was observed in 3 independent experiments. Eight plants of each genotype were grown in each experiment.

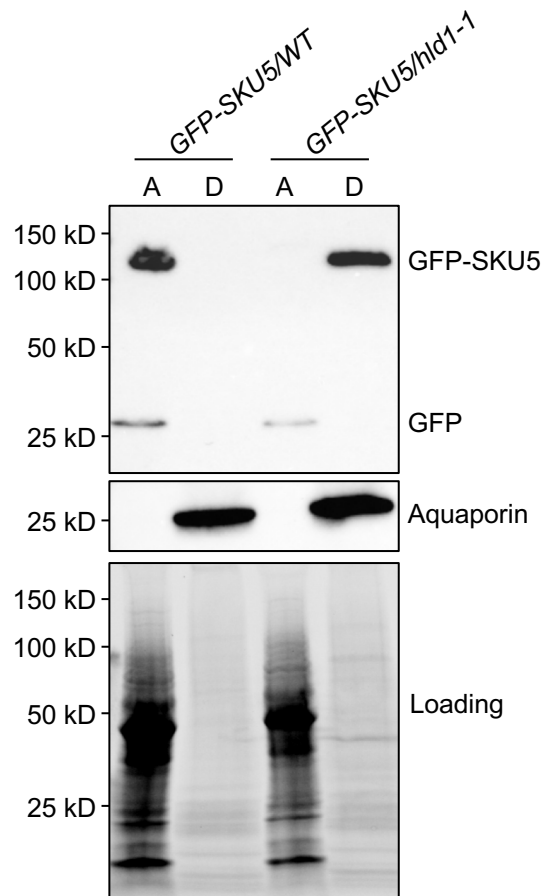

**Supplemental Figure S13. In the HLD1 mutant, an increase in hydrophobicity of GFP-SKU5 is observed.**

GFP-SKU5/WT and GFP-SKU5/hld1 proteins were extracted using 2% Triton X-114 extraction buffer, partitioned into aqueous phase and detergent phases, and subjected to Western blot analysis. The HLD1 mutation resulted in a shift of GFP-SKU5 from aqueous phase to detergent phase, revealing that mutation of HLD1 resulted in an increase of GFP-SKU5 hydrophobicity. A: aqueous phase; D: detergent phase.

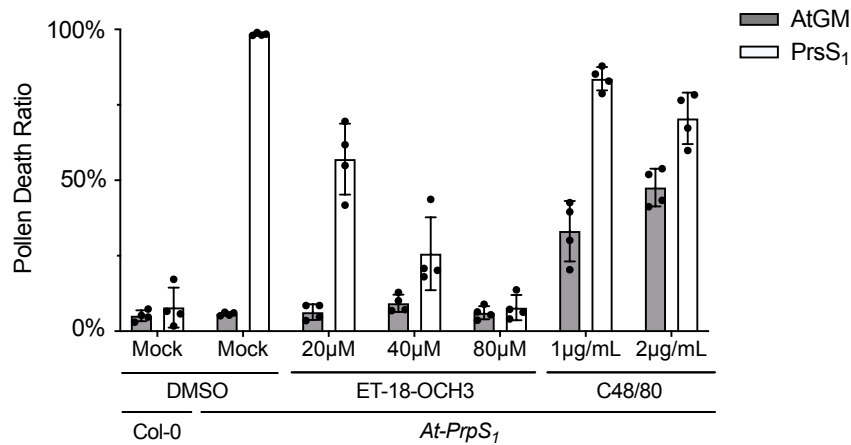

**Supplemental Figure S14. Treatment of PLC inhibitors, ET-18-OCH3 and C48/80, inhibits SI-induced pollen death.**

Col-0 and *At-PrpS<sub>1</sub>* pollen grains were pretreated with different concentrations of PLC inhibitor ET-18-OCH3, C48/80, or solvent (Mock) before subject to SI induction (PrsS<sub>1</sub>) or control treatment (AtGM). The samples were co-stained with FDA and PI 6h after treatment. The PI positive ratios were quantified in. Four independent experiments were carried out. In each experiment, 100-200 pollen grains were counted for each of the sample. See Fig 5D for the results of another PLC inhibitor U73122.

| Mutant line    | Total BC1 plants checked | Number of SC plants | Number of SI plants | SC phenotype |
|----------------|--------------------------|---------------------|---------------------|--------------|
| <i>hld1-3</i>  | 28                       | 28                  | 0                   | 100%         |
| <i>hld1-5</i>  | 21                       | 21                  | 0                   | 100%         |
| <i>hld1-7</i>  | 32                       | 32                  | 0                   | 100%         |
| <i>hld1-19</i> | 24                       | 24                  | 0                   | 100%         |
| <i>hld1-24</i> | 35                       | 35                  | 0                   | 100%         |
| <i>hld1-25</i> | 27                       | 27                  | 0                   | 100%         |

**Supplemental Table S1. Screening of the BC1 population.**

After back-crossing (BC) using M1 mutant pollen with unmutagenized *At*-SI stigma, the resulting BC1 seeds were sown. The siliques of the BC1 plants were scored for either a self-compatible (SC) phenotype, showing long siliques and normal seed set, or a self-incompatible (SI) phenotype with short siliques and ~no seed set. Examination of all 167 BC1 plants revealed that none of them showed the SI phenotype, with 100% of the BC1 plants having a SC phenotype, indicating genuine revertant mutants were identified.

This fits our prediction that all the BC1 plants should be self-compatible, as in the back-cross using M1 mutant pollen on an unmutagenized *At*-SI stigma, WT pollen would undergo SI-PCD triggered by a normal PrpS<sub>1</sub>-PrsS<sub>1</sub> interaction, so only pollen carrying a *hld1* mutation (defective in SI) would be able to fertilize successfully and produce seeds. As the *hld1* SC phenotype existed in all the heterozygous BC1 *hld1* mutant lines examined (n= 167), this demonstrates that the *hld1* mutants are gametophytic.



| mutant         | phenotype   | genotype                                                              | number of plants |
|----------------|-------------|-----------------------------------------------------------------------|------------------|
| <i>hld1-3</i>  | SC          | <i>At3g27325</i> <sup>+/-</sup> or<br><i>At3g27325</i> <sup>-/-</sup> | 7                |
|                | SI          | Not found                                                             | 0                |
| <i>hld1-5</i>  | SC          | <i>At3g27325</i> <sup>+/-</sup> or<br><i>At3g27325</i> <sup>-/-</sup> | 7                |
|                | SI          | Not found                                                             | 0                |
| <i>hld1-7</i>  | SC          | <i>At3g27325</i> <sup>+/-</sup> or<br><i>At3g27325</i> <sup>-/-</sup> | 197              |
|                | SI          | <i>At3g27325</i> <sup>+/+</sup>                                       | 4                |
| <i>hld1-19</i> | SC          | <i>At3g27325</i> <sup>+/-</sup> or<br><i>At3g27325</i> <sup>-/-</sup> | 54               |
|                | SI          | <i>At3g27325</i> <sup>+/+</sup>                                       | 1                |
| <i>hld1-24</i> | SC          | <i>At3g27325</i> <sup>+/-</sup> or<br><i>At3g27325</i> <sup>-/-</sup> | 26               |
|                | SI          | <i>At3g27325</i> <sup>+/+</sup>                                       | 2                |
| <i>hld1-25</i> | Not checked |                                                                       |                  |

**Supplemental Table S2. Segregation analysis of the BC2F1 population.**

Back-cross 2 (BC2) plants were allowed to self, generating a BC2 F1 population. The *At*-SI parent line we selected for the EMS mutagenesis screen was leaky, and not 100% SI, otherwise, the screen would have been impossible. This meant that very few self-incompatible plants could be found in the BC2 F1 population.

Resultant progeny were scored for either a self-compatible (SC) phenotype, showing long siliques and normal seed set, or a self-incompatible (SI) phenotype with short siliques and ~no seed set.

We also scored the genotype (*hld1*<sup>+/+</sup>, *hld1*<sup>+/-</sup>, or *hld1*<sup>-/-</sup>) of the resulting BC2 F1 population using Sanger sequencing. This identified 100% linkage between the *At3g27325* mutation and the self-fertile (SC) phenotype. This indicates that *At3g27325* is highly likely to be the *hld1* causal gene.

| mutant         | Mutation at the DNA level | Mutation in protein level |
|----------------|---------------------------|---------------------------|
| <i>hld1-6</i>  | G1700A                    | W335*                     |
| <i>hld1-17</i> | C234CT                    | K80*                      |
| <i>hld1-18</i> | C5181T                    | Q918*                     |
| <i>hld1-30</i> | G3223A                    | Splice site change        |
| <i>hld1-37</i> | G3913A                    | Splice site change        |
| <i>hld1-39</i> | G4145A                    | Splice site change        |

**Supplemental Table S3. Identification of 6 additional *At3g27325* mutant alleles using Sanger sequencing.**

Genotyping of the *At3g27325* DNA region of the remaining *hld1* mutants using Sanger sequencing identified 6 additional *At3g27325* mutant alleles. It is worth to notice that for *hld1-17*, instead of a point mutation, a thymine insertion was identified, which is rarely observed in EMS mutagenesis screens.

As our screen revealed 12 independent mutant alleles of *HLD1*, but no other mutants, it is likely that other genes involved in SI signaling act redundantly or are key to pollen fertilization, thus cannot be identified by forward genetic screens.

| Line                                                                   | Selfing        | ♀ <i>At-PrsS<sub>1</sub></i> | ♀ <i>Col-0</i> |
|------------------------------------------------------------------------|----------------|------------------------------|----------------|
| <i>At-SI/hld1-7/pHLD1::mCherry-cHLD1</i> <sup>+/-</sup> line 4         | 46.8%(109/233) | -                            | -              |
| <i>At-SI/hld1-7/pHLD1::mCherry-cHLD1</i> <sup>+/-</sup> line 11        | 48.1%(115/239) | 4.7%(25/532)                 | 67.1%(457/681) |
| <i>At-SI/hld1-7/pHLD1::mCherry-cHLD1</i> <sup>+/-</sup> line 16        | 48.5%(113/233) | 2.6%(16/604)                 | 73.2%(510/697) |
| <i>At-SI/hld1-7/pHLD1::mCherry-cHLD1</i> <sup>+/-</sup> line 19        | 50.2%(139/277) | 1.9%(8/432)                  | 74.0%(273/369) |
| <i>At-SI/hld1-7/pHLD1::mCherry-cHLD1</i> <sup>+/-</sup> line 21        | 56.5%(210/372) | -                            | -              |
| <i>At-SI/hld1-7/pHLD1::mCherry-cHLD1</i> <sup>+/-</sup> line 24        | 52.9%(156/295) | -                            | -              |
| <i>At-SI/hld1-7/pHLD1::mCherry-cHLD1(S218A)</i> <sup>+/-</sup> line 1  | 75.6%(198/262) | -                            | -              |
| <i>At-SI/hld1-7/pHLD1::mCherry-cHLD1(S218A)</i> <sup>+/-</sup> line 2  | 75.3%(226/300) | -                            | -              |
| <i>At-SI/hld1-7/pHLD1::mCherry-cHLD1(S218A)</i> <sup>+/-</sup> line 6  | 72.2%(156/216) | 49.1%(112/228)               | 50.1%(305/602) |
| <i>At-SI/hld1-7/pHLD1::mCherry-cHLD1(S218A)</i> <sup>+/-</sup> line 8  | 77.1%(269/349) | -                            | -              |
| <i>At-SI/hld1-7/pHLD1::mCherry-cHLD1(S218A)</i> <sup>+/-</sup> line 12 | 76.1%(249/327) | -                            | -              |
| <i>At-SI/hld1-7/pHLD1::mCherry-cHLD1(S218A)</i> <sup>+/-</sup> line 16 | 76.0%(187/246) | 58.2%(102/175)               | 49.5%(103/208) |
| <i>At-SI/hld1-7/pHLD1::mCherry-cHLD1(S218A)</i> <sup>+/-</sup> line 23 | 80.5%(186/231) | 52.4%(204/389)               | 51.1%(218/427) |

**Supplemental Table S4. HLD1 lipase activity is required for the SI response.**

*Hld1* mutants were transformed with *pHLD1::mCherry-cHLD1* or *pHLD1::mCherry-cHLD1(S218A)* cloned in the pFAST-Green plasmid vector backbone. The pollen of T1 heterozygous plants was used to pollinate self-stigmas, *At-PrsS<sub>1</sub>* or *Col-0* stigmas. Pollen transmission was examined by checking the GFP signals (resulting from the pFAST-Green vector backbone) in the seeds. The ratios of GFP positive seeds of each pollination are shown in the table. The actual numbers of GFP positive seeds and total seeds in each pollination are indicated in the brackets.

For T2 seeds of heterozygous *At-SI/hld1/cHLD1* lines, a ~50% of GFP positive ratio was observed, whereas a ratio of ~75% was observed for *At-SI/hld1/cHLD1(S218A)* lines (**Fig 3C; Table S4**). We reasoned that for the heterozygous T1 *At-SI/hld1/cHLD1* lines, expression of *cHLD1* in the *hld1* mutant pollen rescued the *hld1* mutant phenotype, resulting in SI-induced pollen death, and thus prevented pollen containing the *cHLD1* transgene from achieving fertilization, which led to the reduction of GFP positive T2 seeds ratio from theoretical 75% to ~50%. However, for the heterozygous T1 *At-SI/hld1/cHLD1(S218A)* lines, the S218A mutation could not rescue the *hld1* mutant deficiency, therefore resulting in normal Mendelian segregation of GFP signals in the T2 seeds. Consistent with this hypothesis, there is a significant reduction in the GFP positive seeds ratio when *At-SI/hld1/cHLD1* pollen was pollinated onto *At-PrsS<sub>1</sub>* stigmas compared with that of ♀ *Col-0* × ♂ *At-SI/hld1/cHLD1* (**Fig 3C; Table S4**). However, this difference of GFP positive seeds ratio was not observed for *At-SI/hld1/cHLD1(S218A)* lines (**Fig 3C; Table S4**). These data showed that the *HLD1* WT allele rescued the *hld1* mutant phenotype, but not the S218A mutant allele.

**Supplemental Table S5. Primers used in this research.**

| <b>Primer</b>           | <b>Sequence (5'→3')</b>                                                    |
|-------------------------|----------------------------------------------------------------------------|
| 665_F-op-Bsal-A-pHLD7L  | ATAGAAGTGAAGCTTGGTCTCAACCTtgaacagtataacgcatatatatatataacttctaggcc          |
| 666_R-pHLD7-mB          | GCAATGGCTCGGTCTgTCATCCAGTCATGG                                             |
| 667_F-pHLD7-mB          | CCATGACTGGATGAcAGACCGAGCCATTGC                                             |
| 668_R-op-Bsal-B-pHLD7L  | ATAGGGCGAGAATTCGGTCTCATGTTTTTCAAGCTTTCAAGAGTACTAGAGTGAAAGTGCT<br>CTTGTTTCC |
| 675_R-HLD7-mB2          | GGATAAGAGCATTGATTGAGATGAcACCTCCACGGC                                       |
| 676_F-HLD7-mB2          | GCCGTGGAGGTgTCATCTCAATCAATGCTCTTATCC                                       |
| 677_R-HLD7-mB3          | CCAACAAATAACAGATCAACGAcACCACTGTGAAGC                                       |
| 678_F-HLD7-mB3          | GCTTCACAGTGGTgTCGTTGATCTGTTATTTGTTGG                                       |
| 679_R-HLD7-mB4          | GCTTGACTCGGGTCTgGAGTTCAGTATTCCATGG                                         |
| 680_F-HLD7-mB4          | CCATGGAATACTGAACTCcAGACCCGAGTCAAGC                                         |
| 683_R-op-Bsal-D-HLD7_ns | ATAGGGCGAGAATTCGGTCTCACTGAGTTTCTGTGATTCTGCTTTTTAGTACGGAAACG                |
| 732_F-op-Bsal-C-cHLD7.1 | ATAGAAGTGAAGCTTGGTCTCAGGCTATGCGTGATGTAAGATTTGCTATGAGCATTCCG                |
| 817_HLD7-gRNA1          | AGAGTCGAAGTAGTGATTGGTGACGGATGATACAACCTCCGTTTTAGAGCTAGAAATAGCA              |
| 818_HLD7-gRNA2          | AGAGTCGAAGTAGTGATTGAATCTGATAGAGCGTTTCAGGTTTTAGAGCTAGAAATAGCA               |
| 819_HLD7-gRNA3          | AGAGTCGAAGTAGTGATTGTGGTAATTTACTGGACGCAGGTTTTAGAGCTAGAAATAGCA               |
| 820_HLD7-gRNA4          | AGAGTCGAAGTAGTGATTGGATGGCTGCAATGCCAGAGGGTTTTAGAGCTAGAAATAGCA               |
| 833_HLD7-S218A-F        | GTGATCTTGTTGGGCATGCTATGGGTGGTTTTGTTGC                                      |
| 834_HLD7-S218A-R        | GCAACAAAACCACCCATAGCATGCCCAACCAAGATCAC                                     |
| LB_SAIL                 | gcctttcagaaatggataaatagcc                                                  |
| Lp_seth1-2              | AGTTGATGGCCTCACATTTTG                                                      |
| Rp_seth1-2              | TGCAACCCAAAGTTGAATTC                                                       |
| LB_SALK                 | ATTTTGCCGATTTTCGGAACC                                                      |
| Lp_seth2                | GAGTCGAAATGCTAGGTGCAG                                                      |
| Rp_seth2                | CACTTATTCCTGGCGAGTCTG                                                      |

## References:

44. Y. Kim, K. S. Schumaker, J. K. Zhu, EMS mutagenesis of Arabidopsis. *Methods in molecular biology* (Clifton, N.J.) **323**, 101-103 (2006)10.1385/1-59745-003-0:101).
45. A. Healey, A. Furtado, T. Cooper, R. J. Henry, Protocol: a simple method for extracting next-generation sequencing quality genomic DNA from recalcitrant plant species. *Plant Methods* **10**, 21 (2014); published online Epub2014/06/27 (10.1186/1746-4811-10-21).
46. H. Lindner, M. T. Raissig, C. Sailer, H. Shimosato-Asano, R. Bruggmann, U. Grossniklaus, SNP-Ratio Mapping (SRM): Identifying Lethal Alleles and Mutations in Complex Genetic Backgrounds by Next-Generation Sequencing. *Genetics* **191**, 1381-1386 (2012)10.1534/genetics.112.141341).
47. A. Lampropoulos, Z. Sutikovic, C. Wenzl, I. Maegele, J. U. Lohmann, J. Forner, GreenGate - A Novel, Versatile, and Efficient Cloning System for Plant Transgenesis. *PLOS ONE* **8**, e83043 (2013)10.1371/journal.pone.0083043).
48. J.-P. Concordet, M. Haeussler, CRISPOR: intuitive guide selection for CRISPR/Cas9 genome editing experiments and screens. *Nucleic Acids Research* **46**, W242-W245 (2018)10.1093/nar/gky354).
49. Y. Taguchi, H. M. Schätzl, Small-scale Triton X-114 Extraction of Hydrophobic Proteins. *Bio-protocol* **4**, e1139 (2014); published online Epub2014/06/05 (10.21769/BioProtoc.1139).
50. C. Bordier, Phase separation of integral membrane proteins in Triton X-114 solution. *Journal of Biological Chemistry* **256**, 1604-1607 (1981).
51. D. Wessel, U. I. Flügge, A method for the quantitative recovery of protein in dilute solution in the presence of detergents and lipids. *Analytical Biochemistry* **138**, 141-143 (1984); published online Epub1984/04/01/ ([https://doi.org/10.1016/0003-2697\(84\)90782-6](https://doi.org/10.1016/0003-2697(84)90782-6)).
52. L. Abas, C. Luschnig, Maximum yields of microsomal-type membranes from small amounts of plant material without requiring ultracentrifugation. *Analytical Biochemistry* **401**, 217-227 (2010); published online Epub2010/06/15/ (<https://doi.org/10.1016/j.ab.2010.02.030>).
53. B.-Q. Gong, J. Xue, N. Zhang, L. Xu, X. Yao, Q.-J. Yang, Y. Yu, H.-B. Wang, D. Zhang, J.-F. Li, Rice Chitin Receptor OsCEBiP Is Not a Transmembrane Protein but Targets the Plasma Membrane via a GPI Anchor. *Molecular Plant* **10**, 767-770 (2017)10.1016/j.molp.2016.12.005).
54. L. Wang, M. Triviño, Z. Lin, J. Carli, D. J. Eaves, D. Van Damme, M. K. Nowack, V. E. Franklin-Tong, M. Bosch, New opportunities and insights into Papaver self-incompatibility by imaging engineered Arabidopsis pollen. *Journal of Experimental Botany* **71**, 2451-2463 (2020)10.1093/jxb/eraa092).
55. J. Schindelin, I. Arganda-Carreras, E. Frise, V. Kaynig, M. Longair, T. Pietzsch, S. Preibisch, C. Rueden, S. Saalfeld, B. Schmid, J.Y. Tinevez, D.J. White, V. Hartenstein, K. Eliceiri, P. Tomancak A. Cardona, Fiji: an open-source platform for biological-image analysis. *Nature Methods* **9**, 676-682 (2012)10.1038/nmeth.2019).
